# Supplementary material for: Synthesis, Anticancer Activity, and Preliminary Pharmacokinetic Evaluation of 4,4-Disubstituted Curcuminoid 2,2-bis(Hydroxymethyl)Propionate Derivatives
Source: PubMed Central journal article supplement (PMC7037731; doi:10.3390/molecules25030479), 2020-01-22
Supplement: molecules-25-00479-s001.pdf [file molecules-25-00479-s001.pdf]

## Supporting Information

# Synthesis, anticancer activity, and preliminary pharmacokinetic evaluation of 4,4-disubstituted curcuminoid 2,2-bis(hydroxymethyl)propionate derivatives

Der-Yen Lee, Yu-Chi Hou, Jai-Sing Yang, Hui-Yi Lin, Tsu-Yuan Chang, Kuo-Hsiung Lee, Sheng-Chu Kuo, Min-Tsang Hsieh

### Porcine liver esterase mediated hydrolysis of curcumin 2,2-bis(hydroxymethyl)propionate **1**

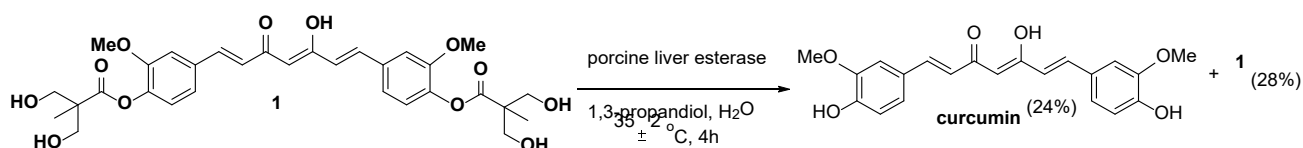

To a stirred solution of compound **1** (0.200 g, 0.29 mmol) in 1,3-propanediol/water (ratio = 1:3, 4mL) was added porcine liver esterase (10 mg, lyophilized powder, ≥15 units/mg solid) in one portion. The resulting mixture was stirred at 35 ± 2 °C for 4 hours under air atmosphere. H<sub>2</sub>O (6 mL) was added to quench the reaction. The aqueous layer was separated and extracted with CH<sub>2</sub>Cl<sub>2</sub> (3 × 6 mL). The combined organic extracts were washed with brine, dried over MgSO<sub>4</sub>, filtered and concentrated to give the crude product, which was then purified by flash chromatography on silica gel with EtOAc/*n*-hexane/CH<sub>2</sub>Cl<sub>2</sub> (1:2:1) to afford curcumin (0.026 g, 24% yield) as an yellow soild and recover compound **1** (0.056 g, 28% yield).

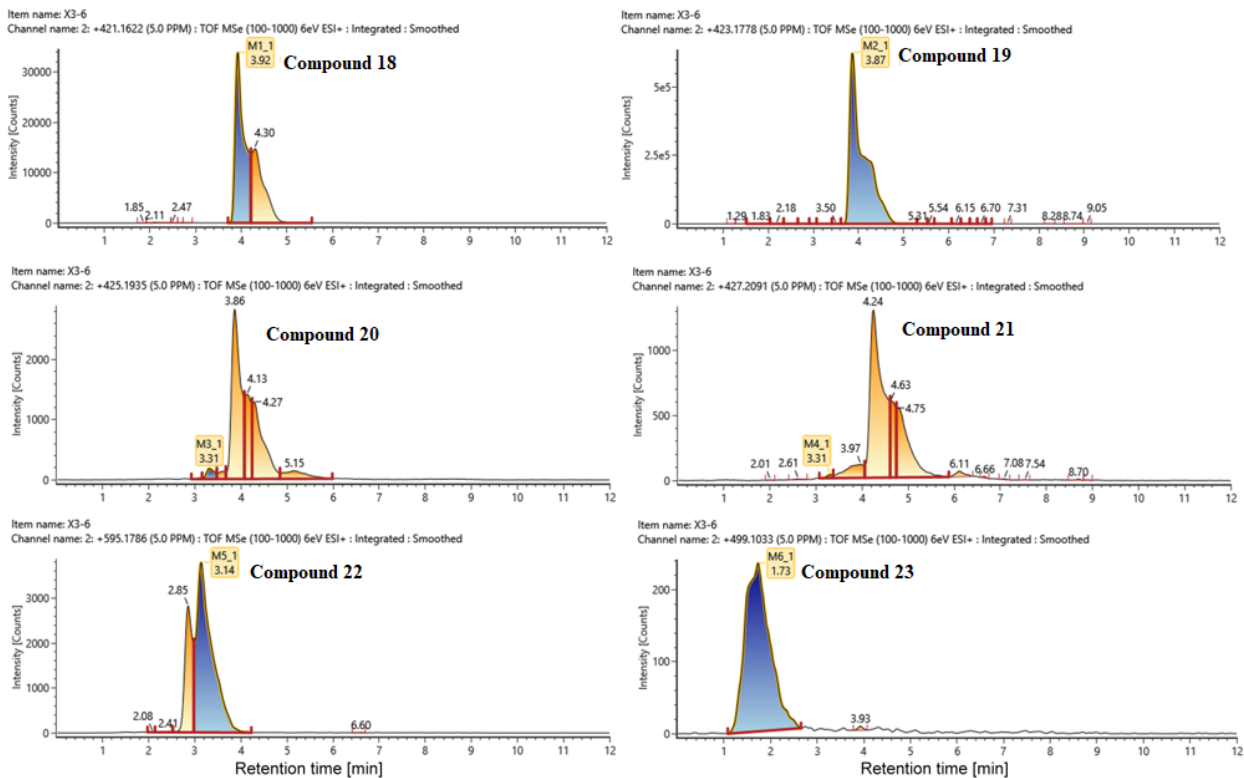

**Figure S1.** The analysis of compound 18, 19, 20, 21, 22 and 23 was performed by Waters Vion IMS QToF mass spectrometer. The acquired m/z and isotope pattern were processed by UNIFI software to illustrate chromatogram. The m/z values of the parent ions were set to 421.1622 for 18, 423.1778 for 19, 425.1935 for 20, 427.2091 for 21, 595.1786 for 22 and 499.1033 for 23, respectively.

# The NMR sepctrums of newly synthesized compounds

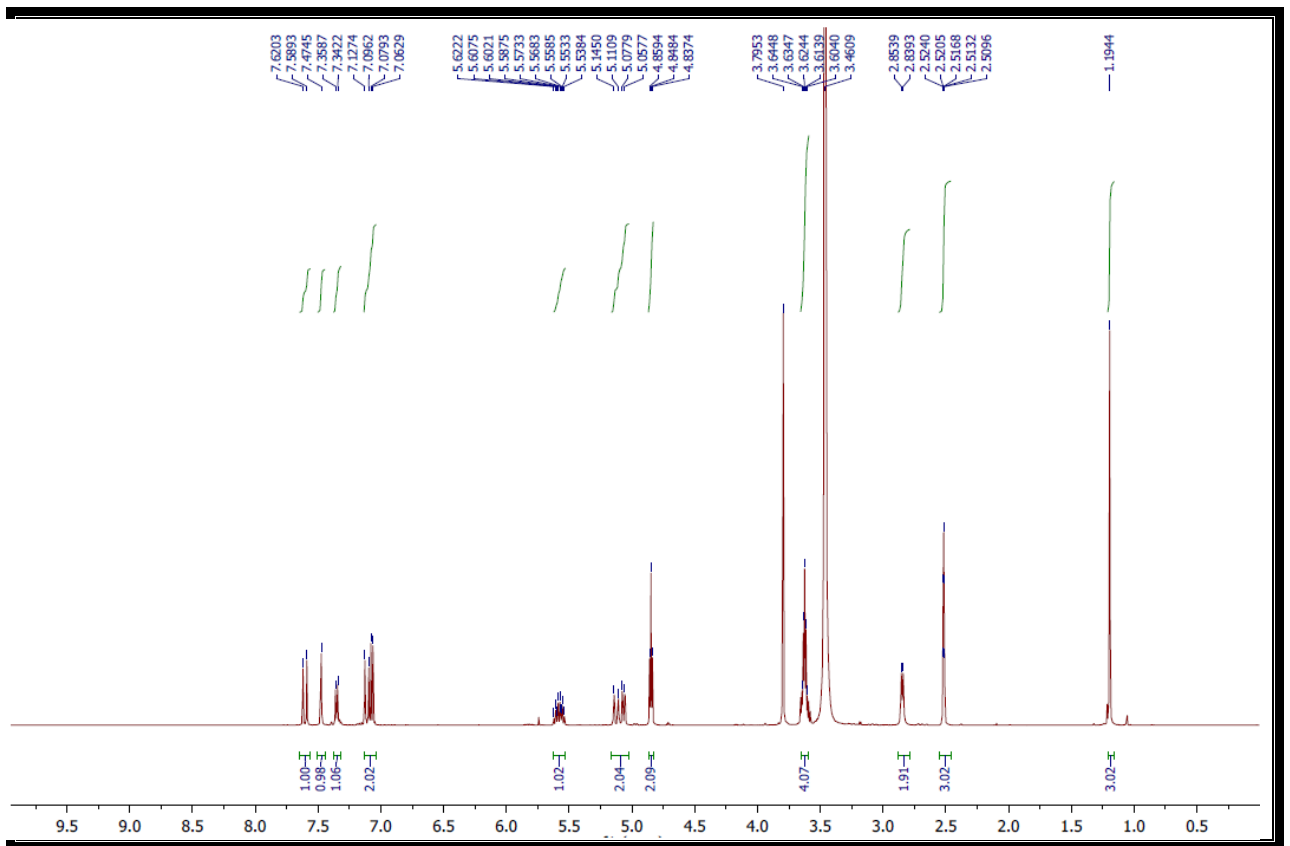

<sup>1</sup>H spectrum of 6

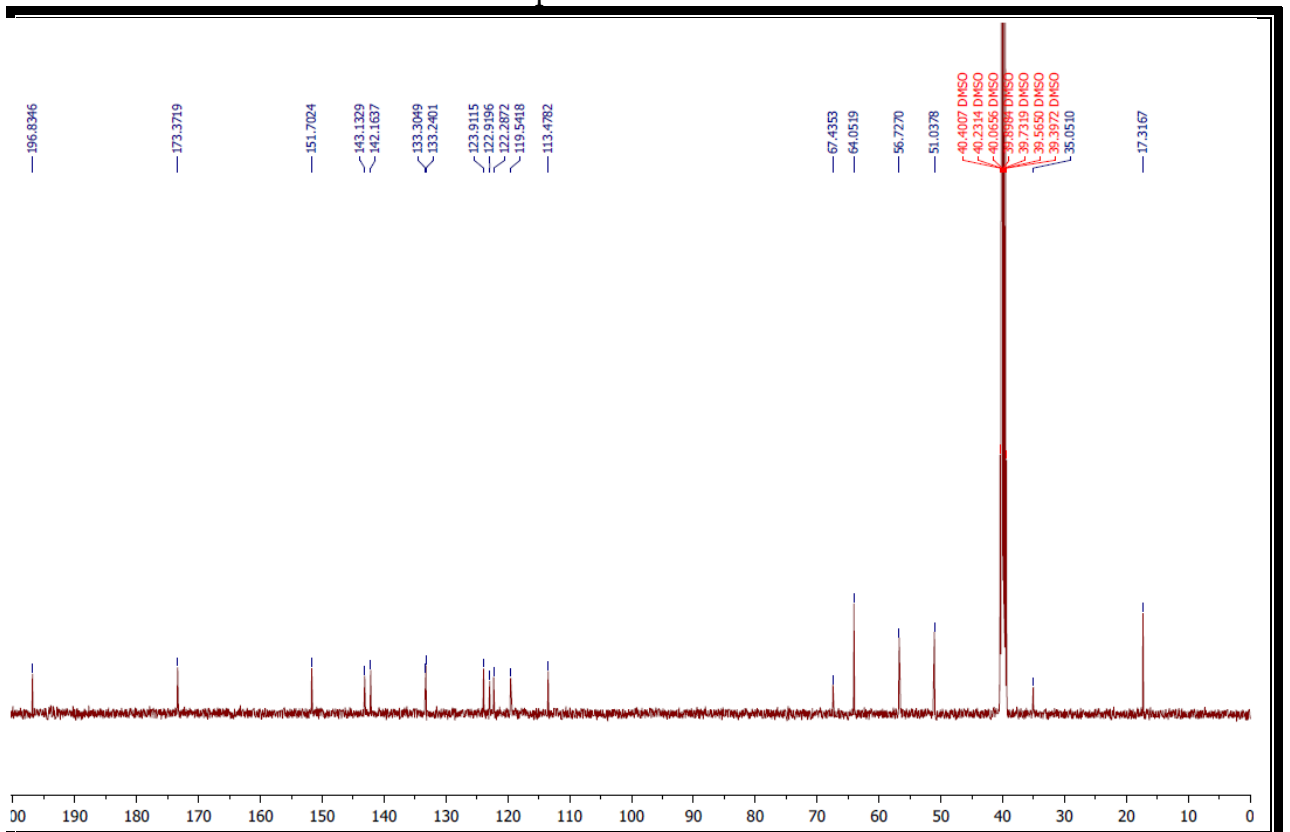

<sup>13</sup>C spectrum of 6

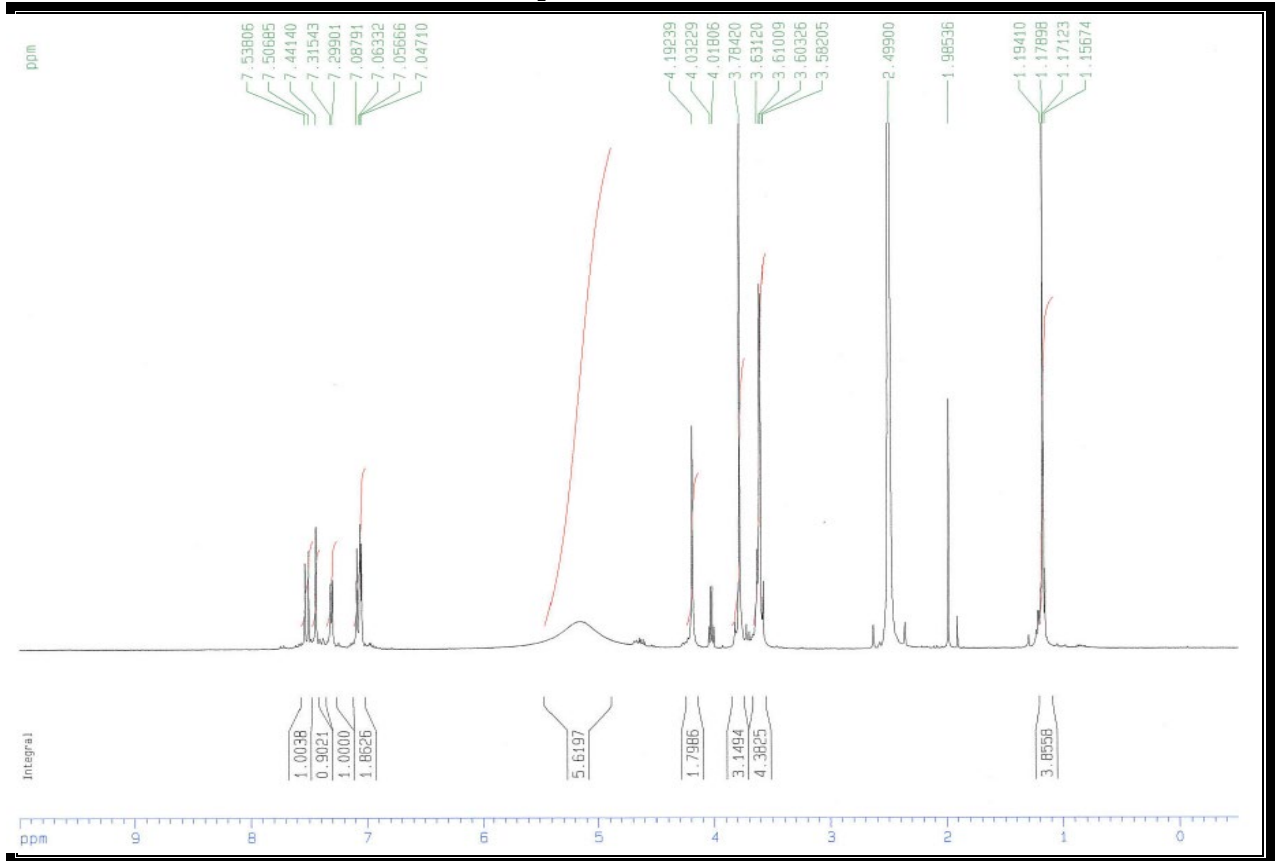

<sup>1</sup>H spectrum of 9

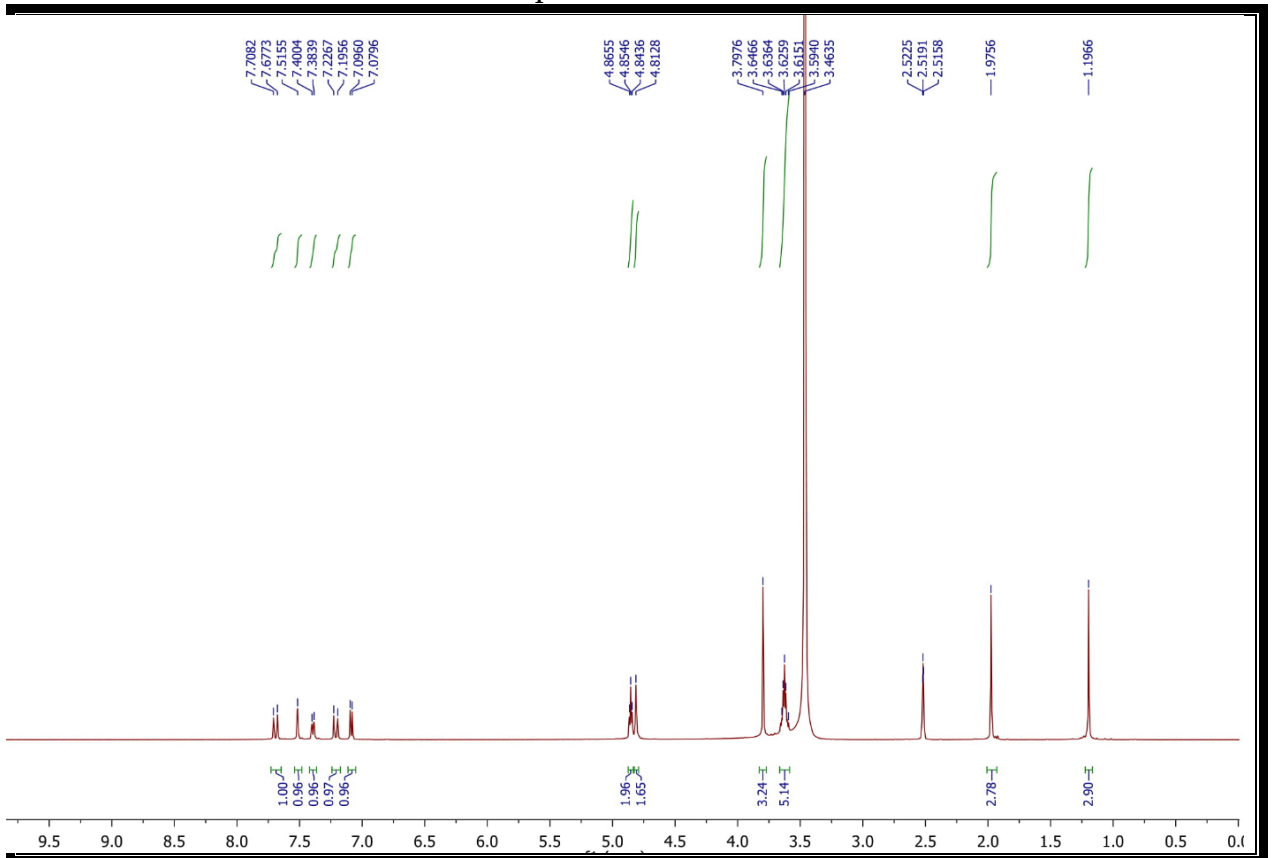

# <sup>1</sup>H spectrum of 10

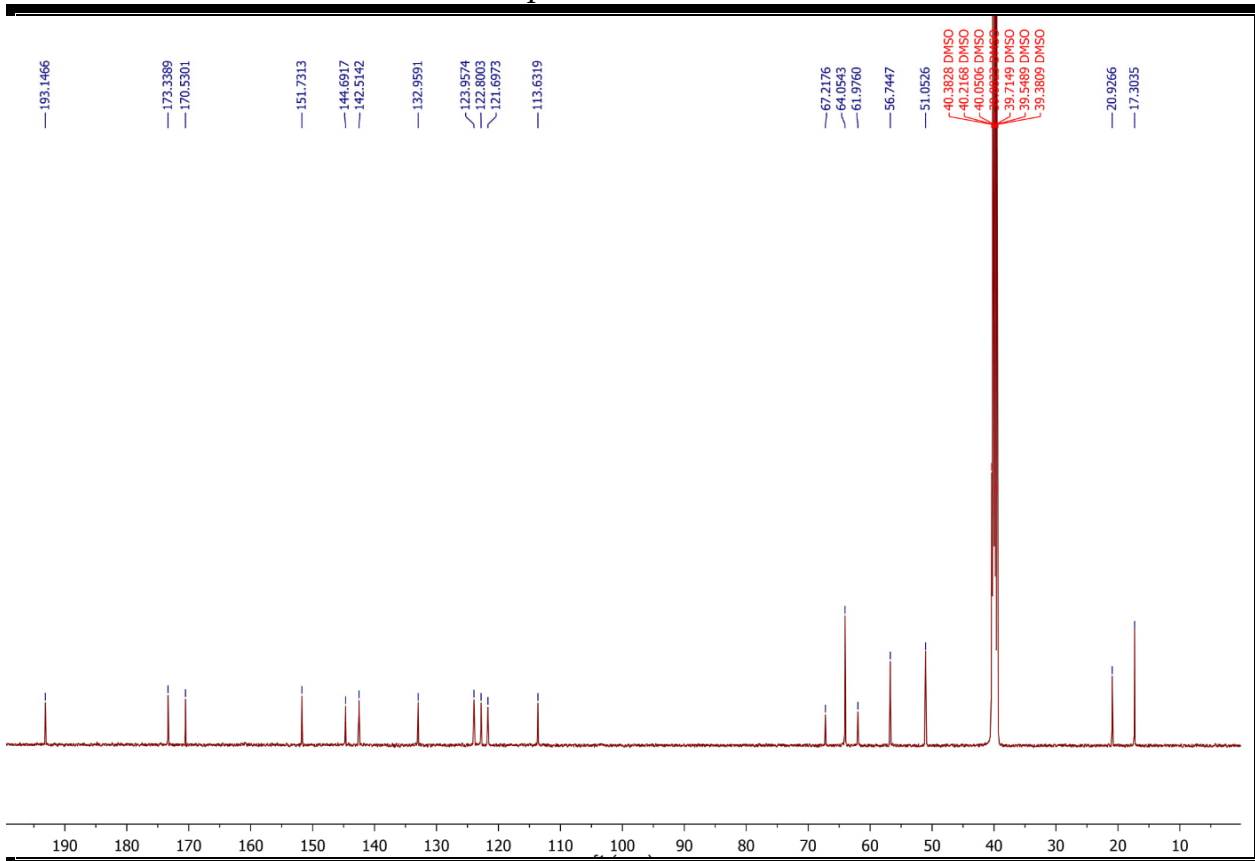

# <sup>13</sup>C spectrum of 10

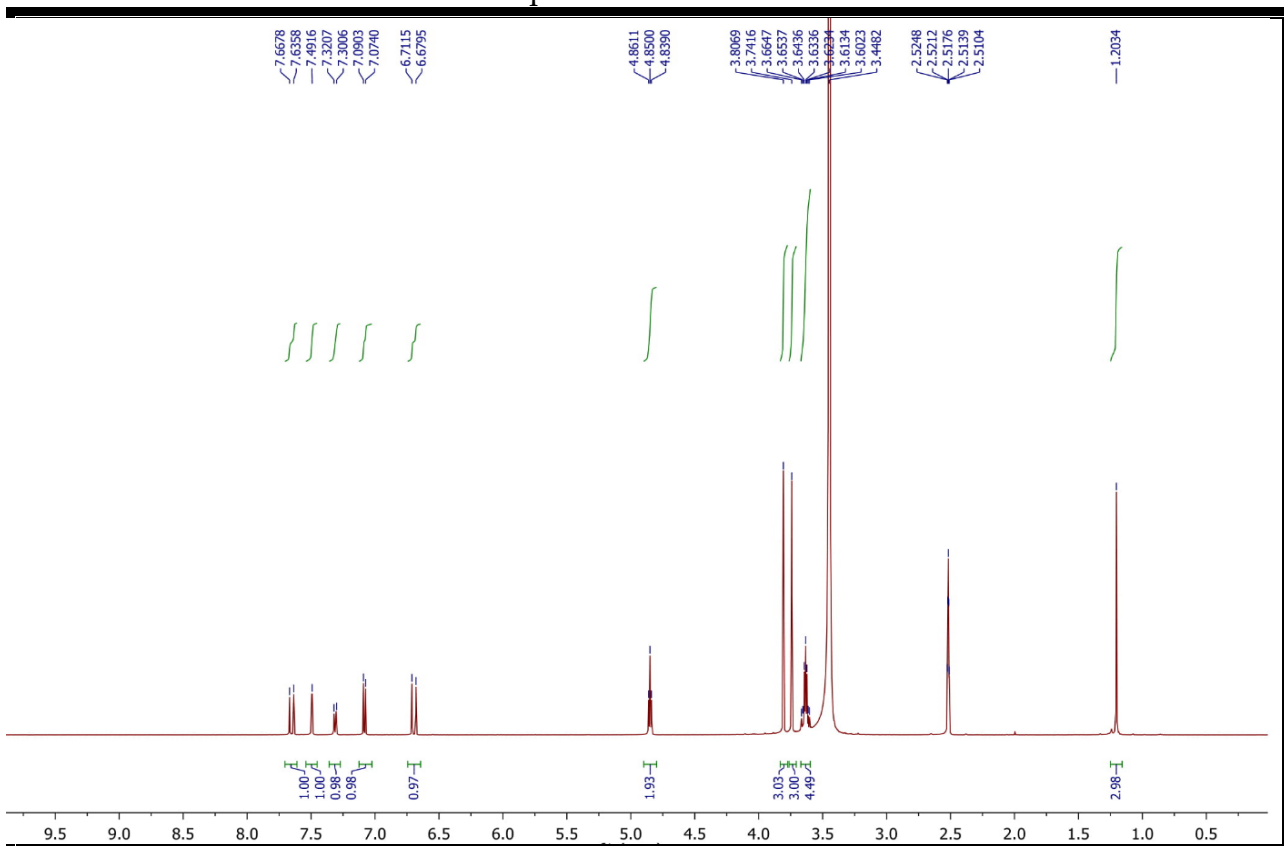

# <sup>1</sup>H spectrum of 11

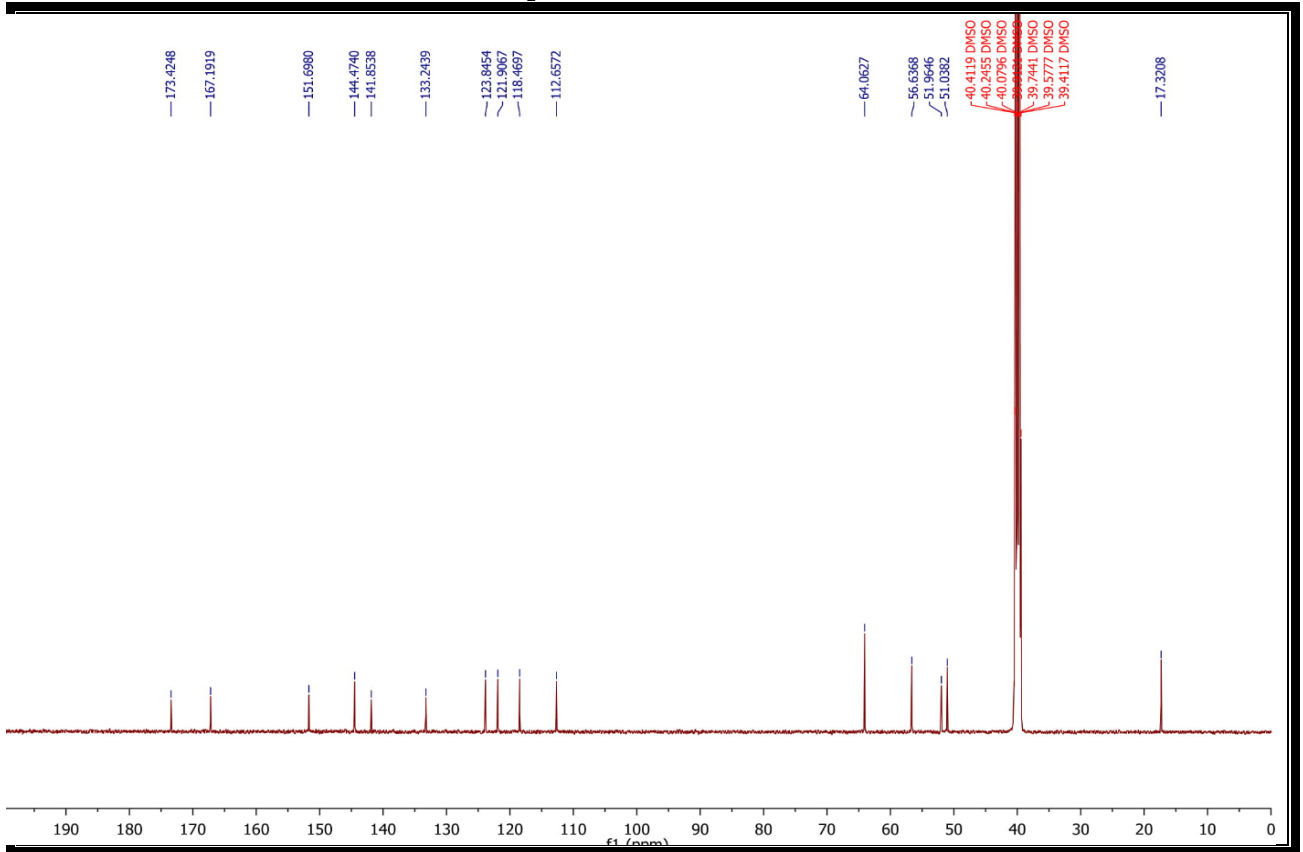

# <sup>13</sup>C spectrum of 11

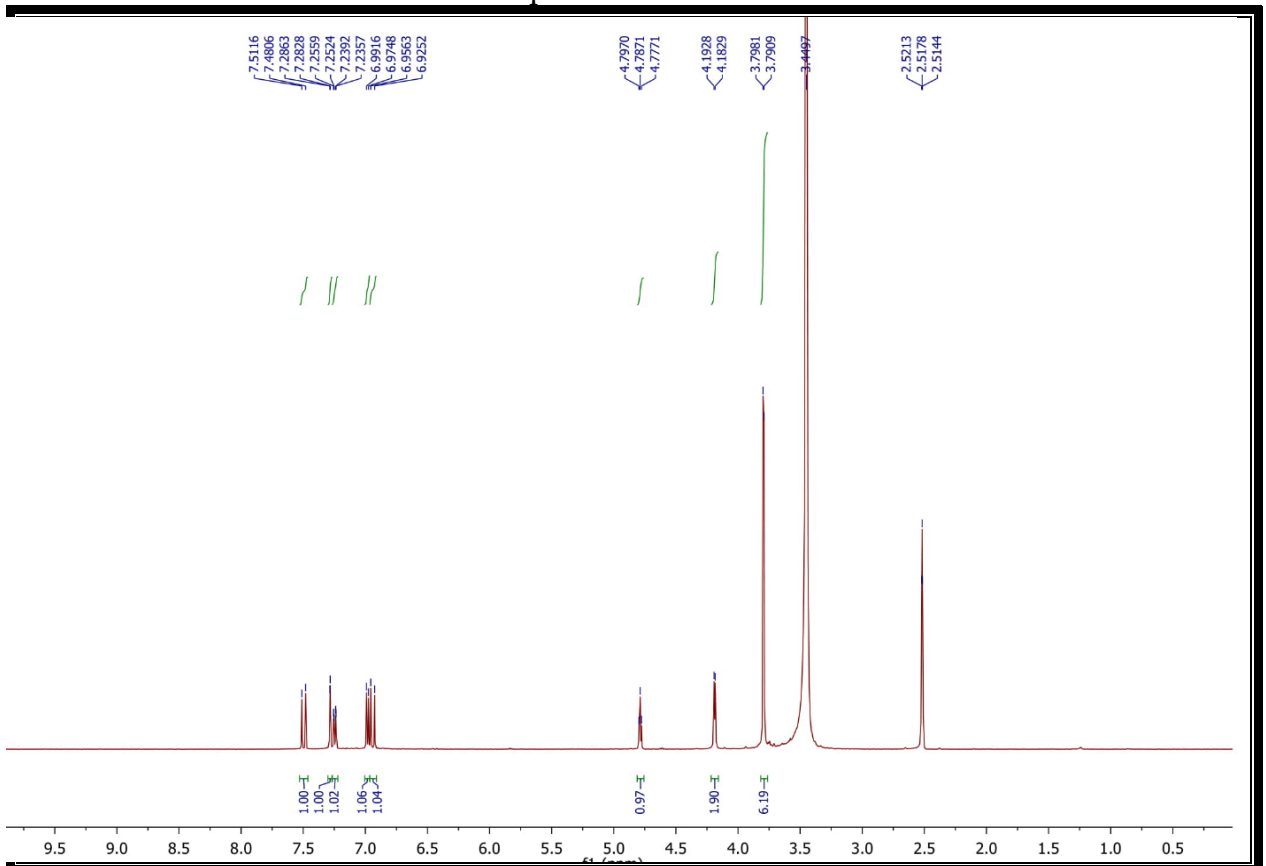

$^1\text{H}$  spectrum of 12

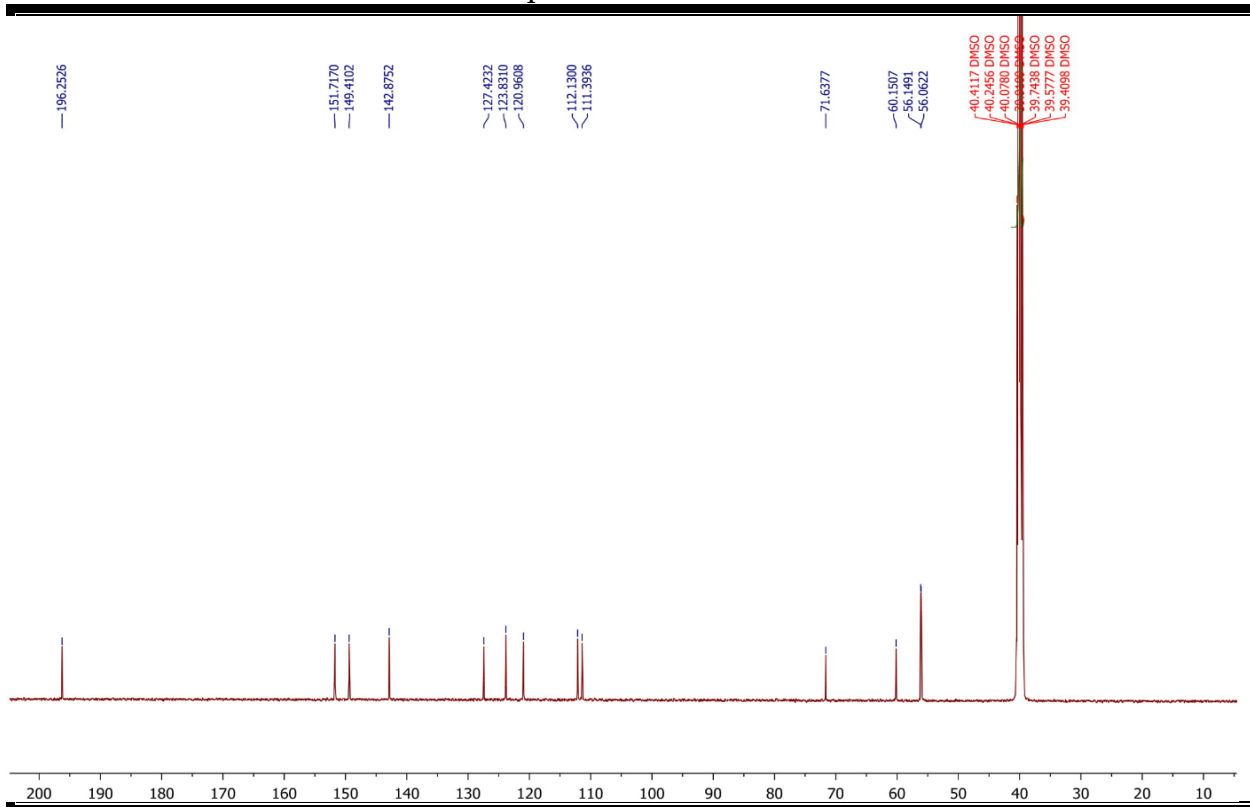

$^{13}\text{C}$  spectrum of 12

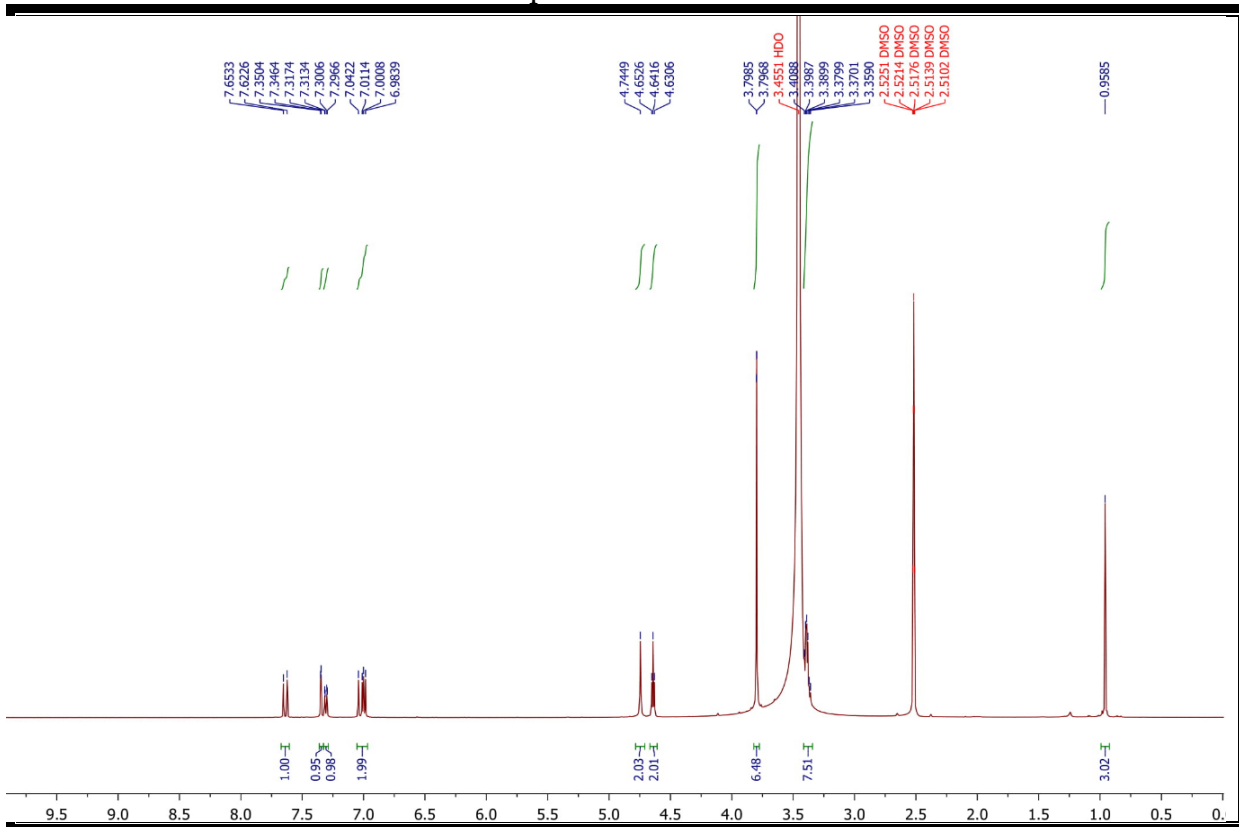

$^1\text{H}$  spectrum of 14

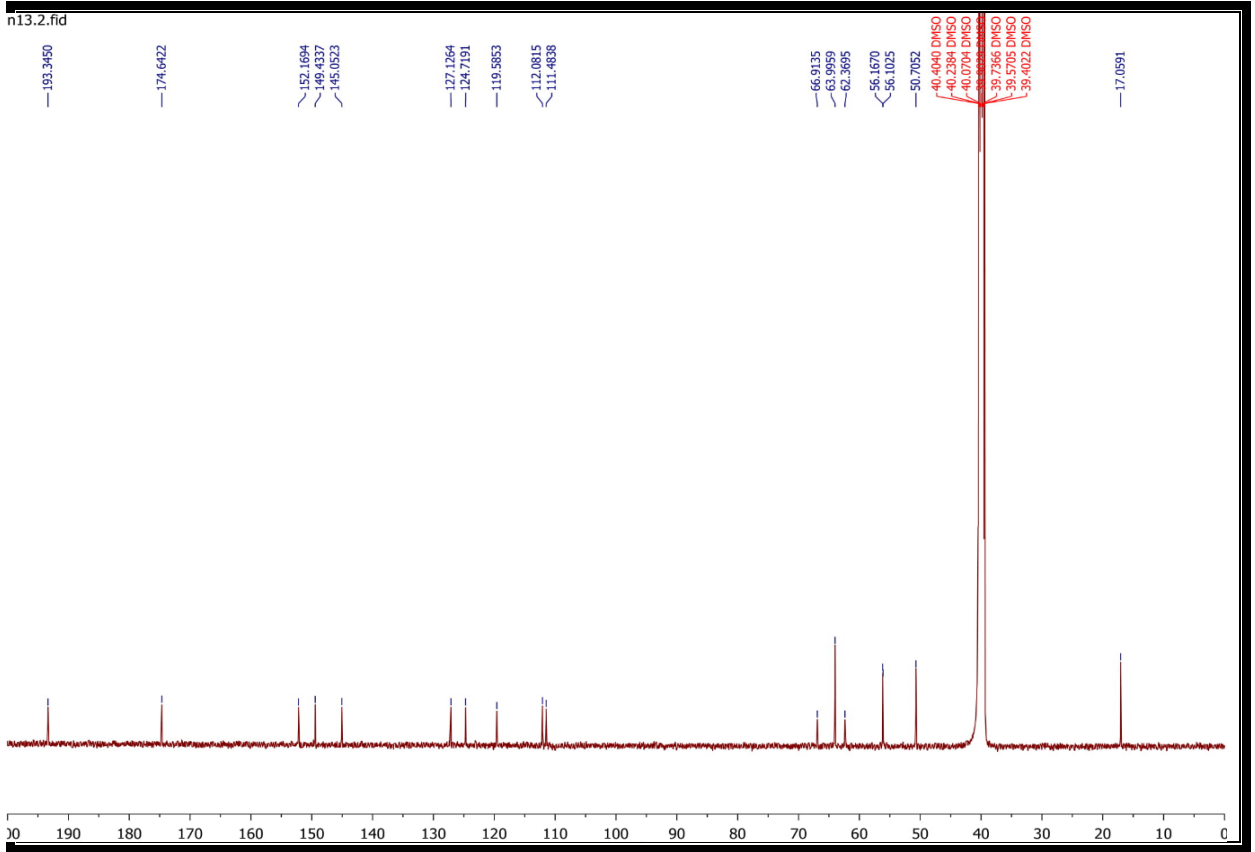

$^{13}\text{C}$  spectrum of 14

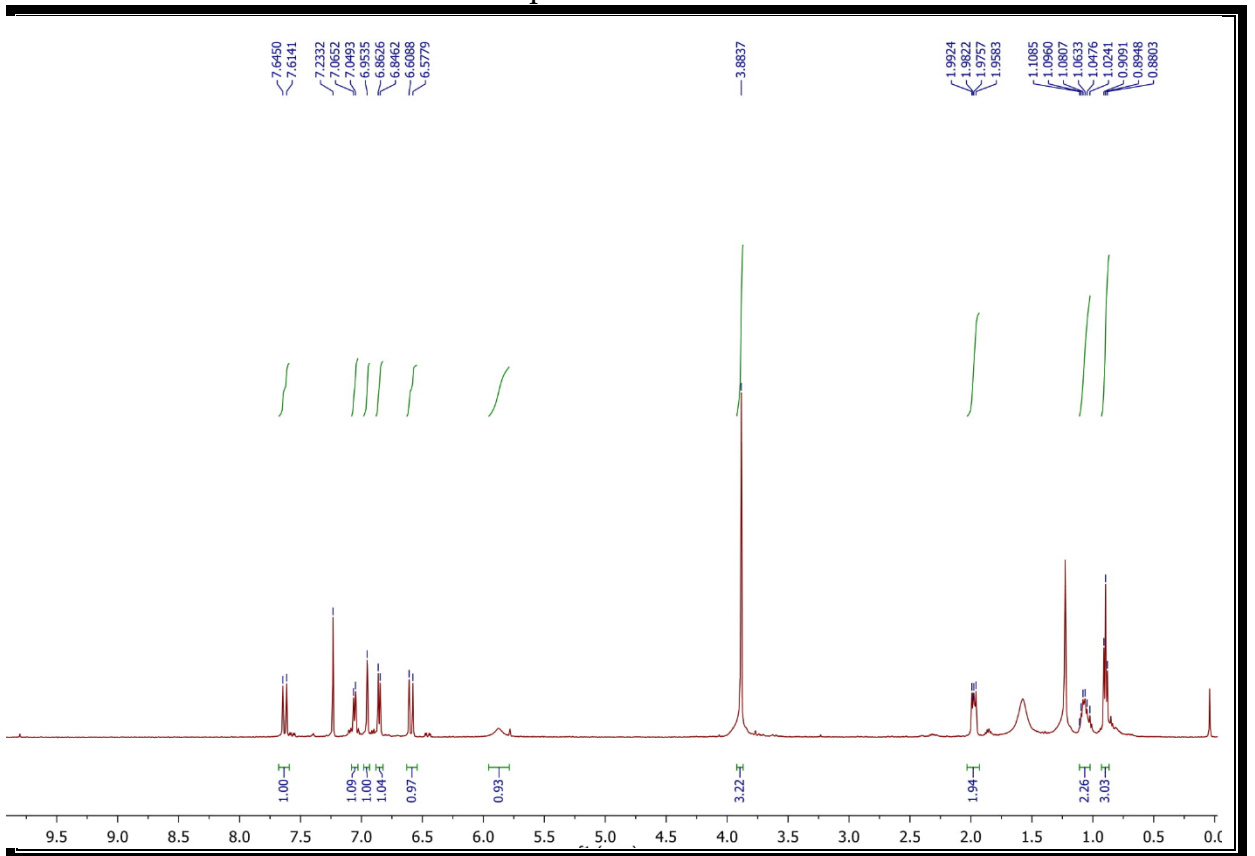

$^1\text{H}$  spectrum of 15



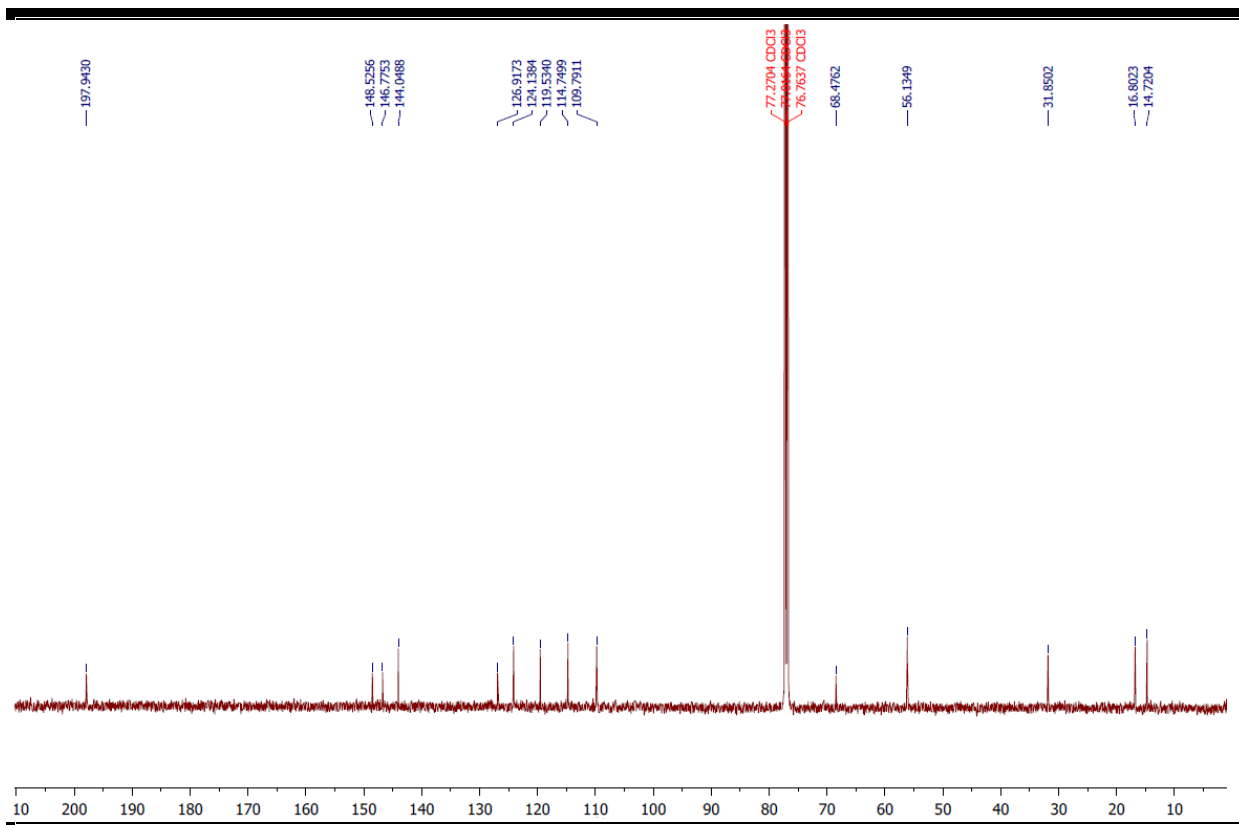

<sup>13</sup>C spectrum of 15

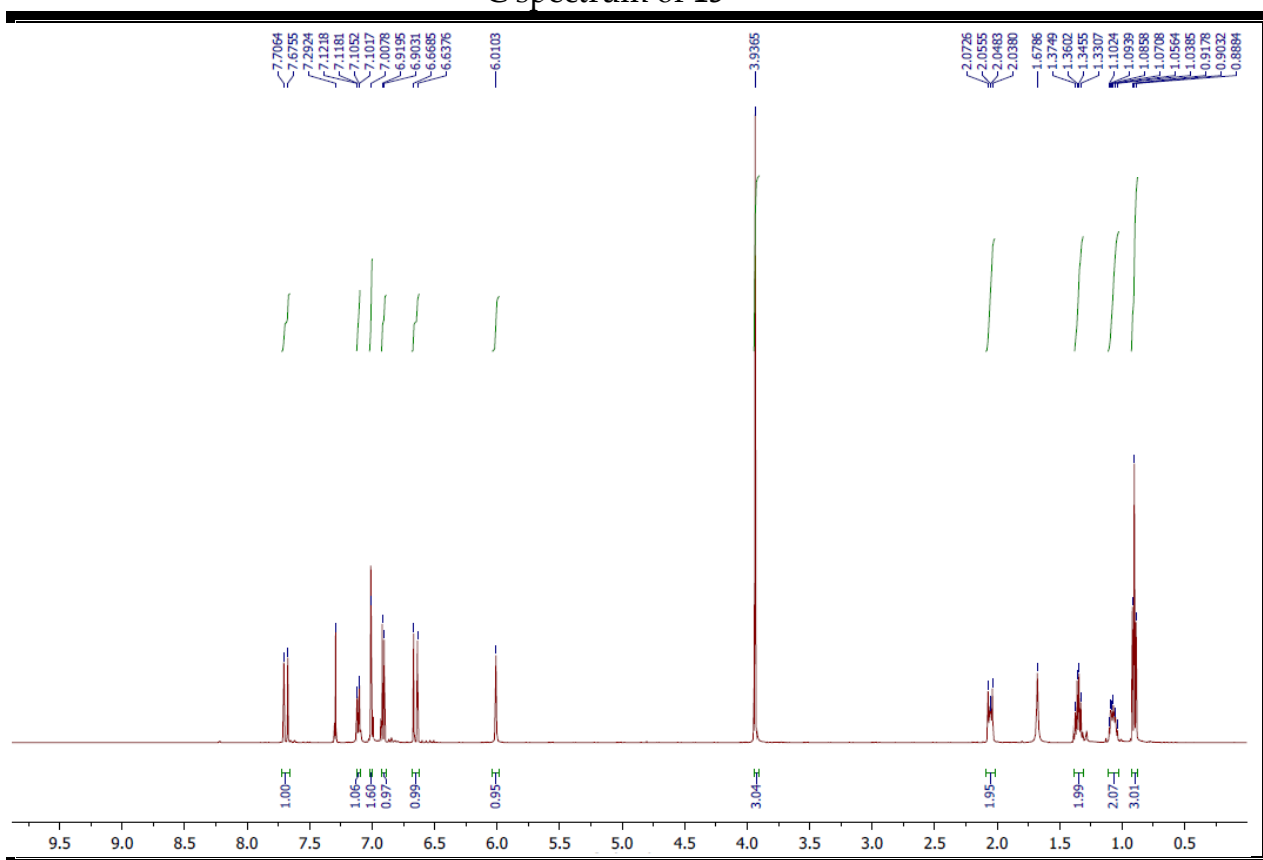

<sup>1</sup>H spectrum of 16

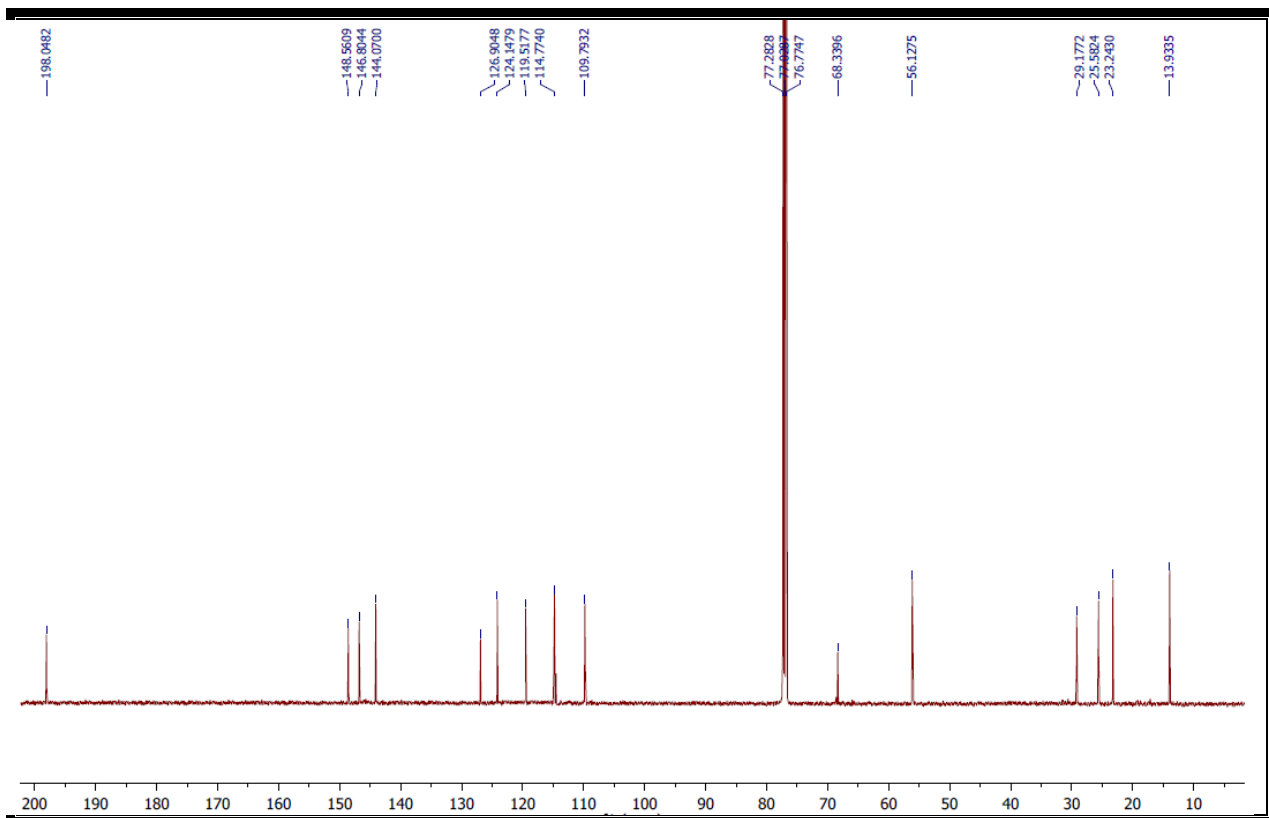

$^{13}\text{C}$  spectrum of 16

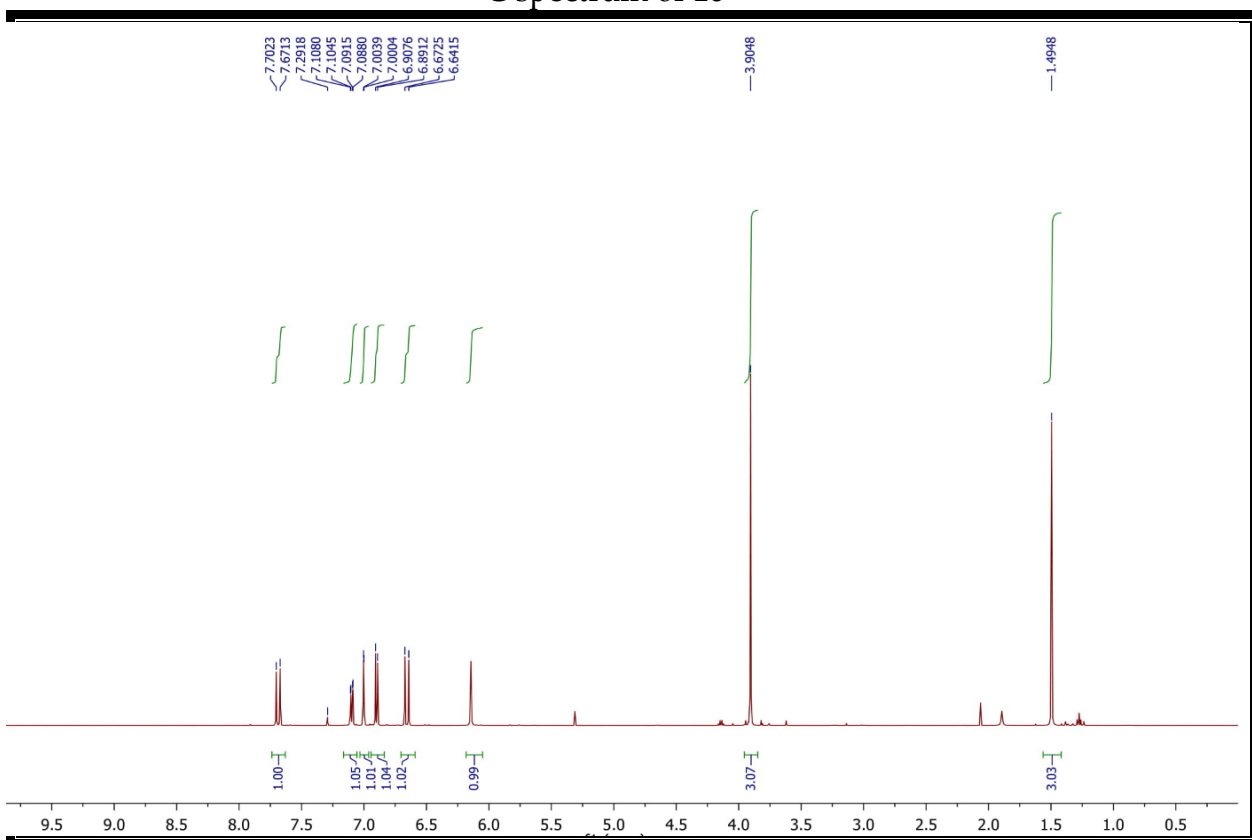

$^1\text{H}$  spectrum of 2m

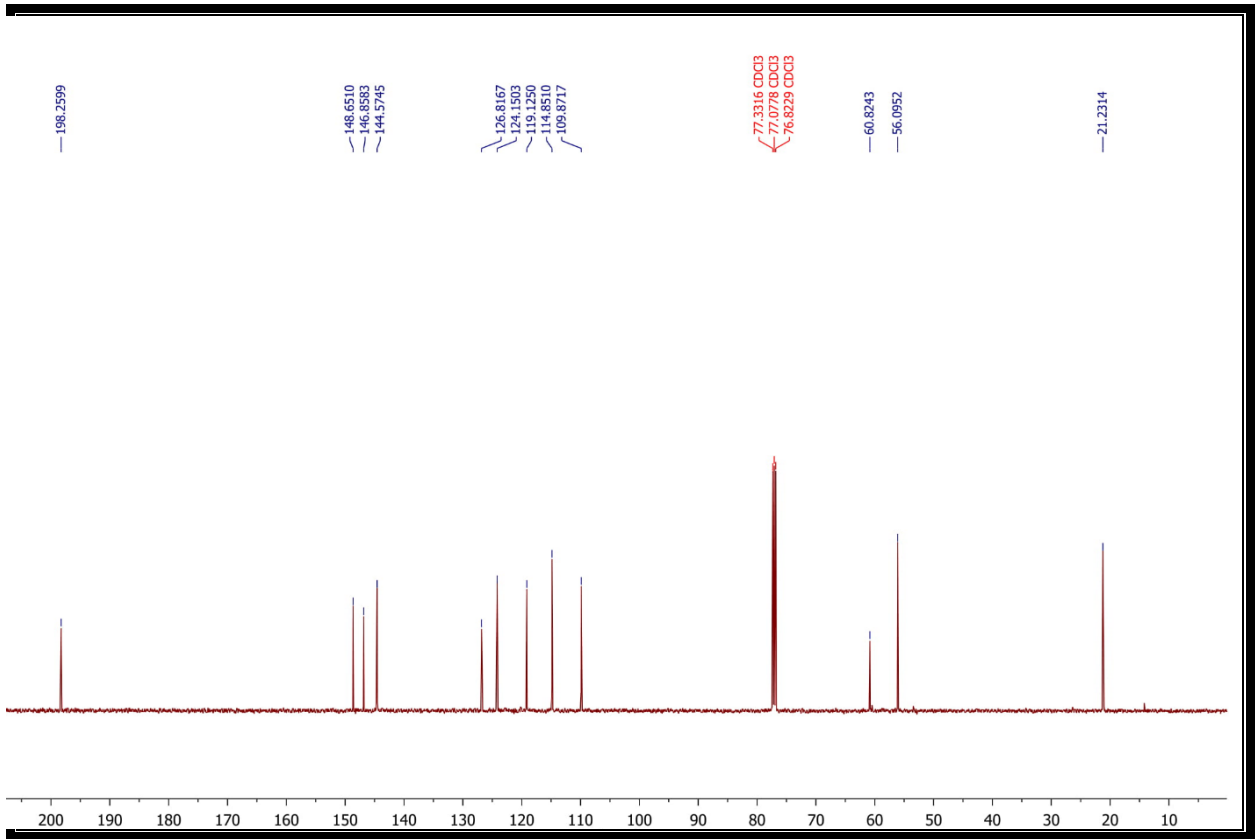

$^{13}\text{C}$  spectrum of **2m**

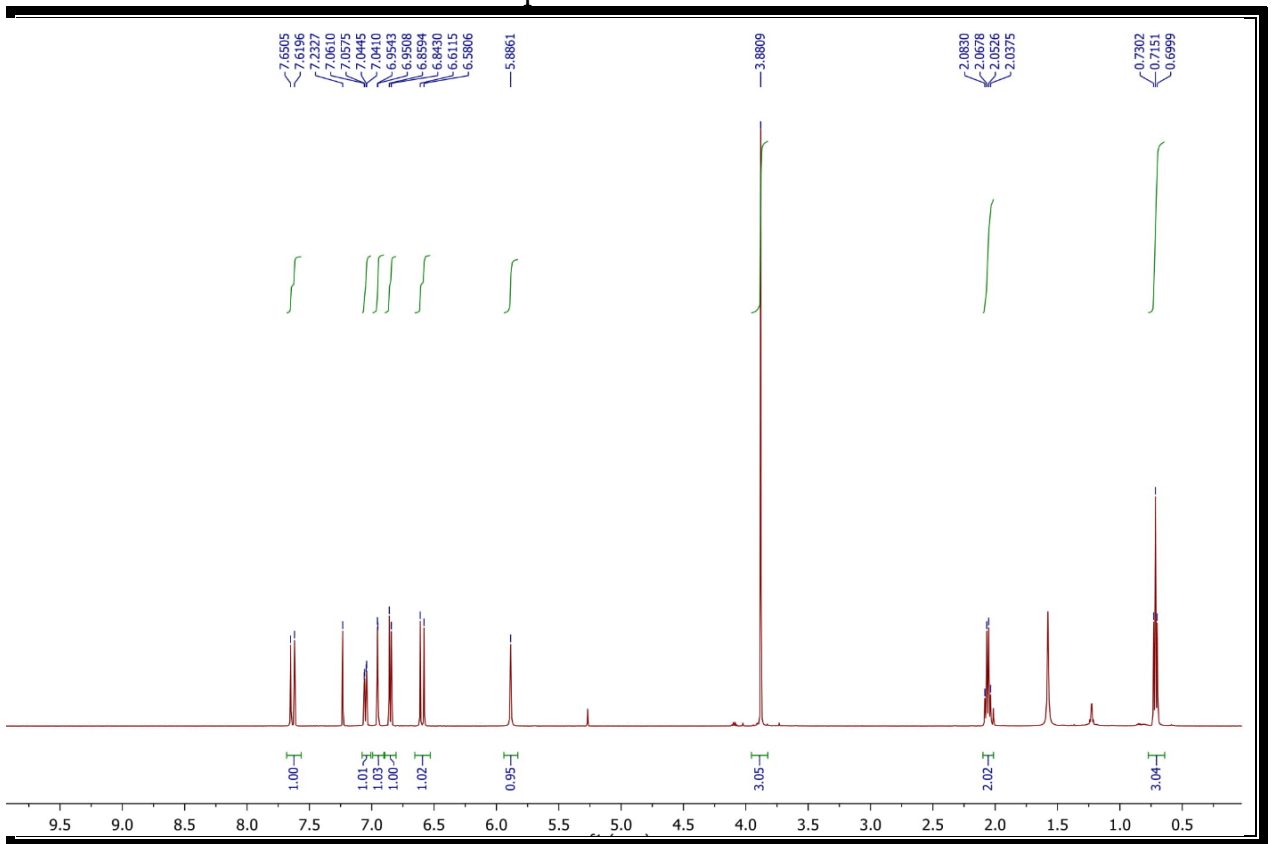

$^1\text{H}$  spectrum of **3m**

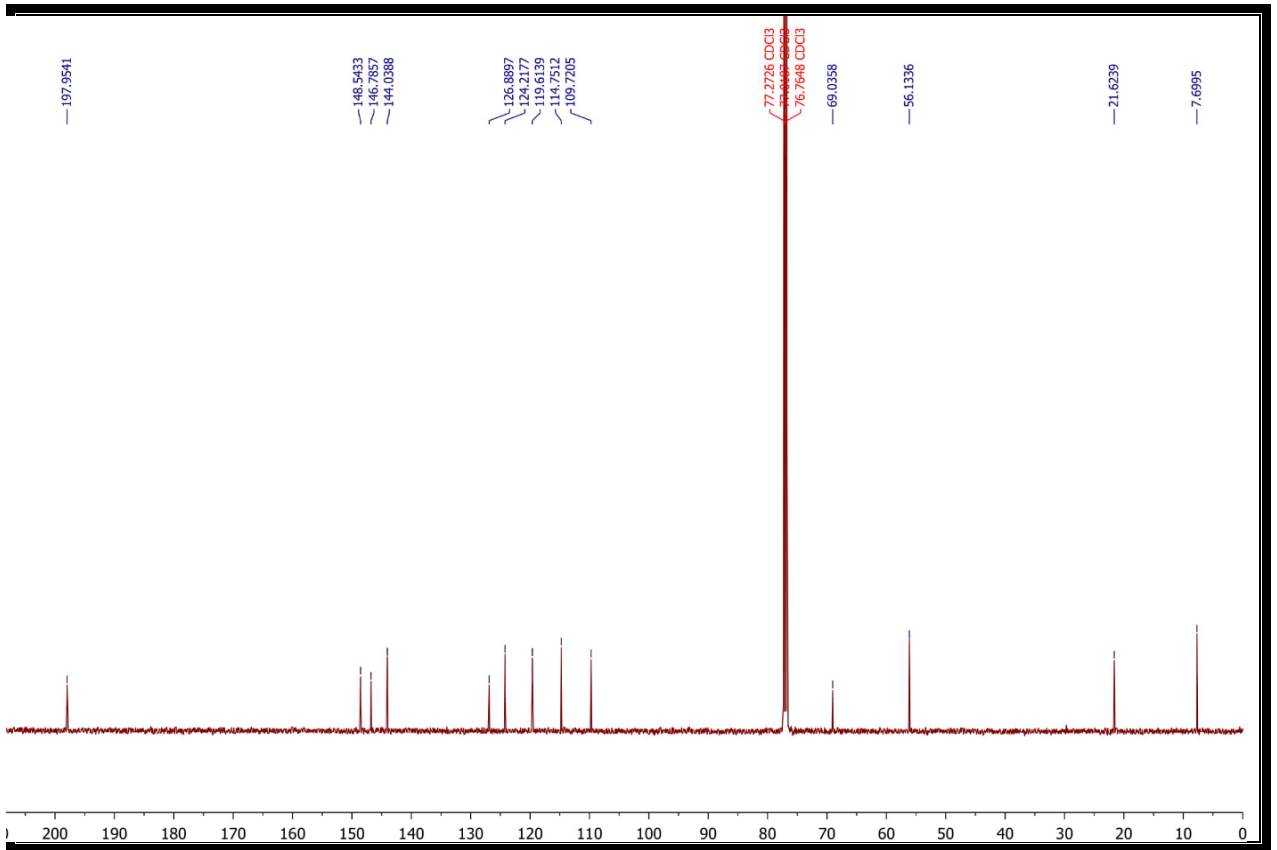

$^{13}\text{C}$  spectrum of **3m**

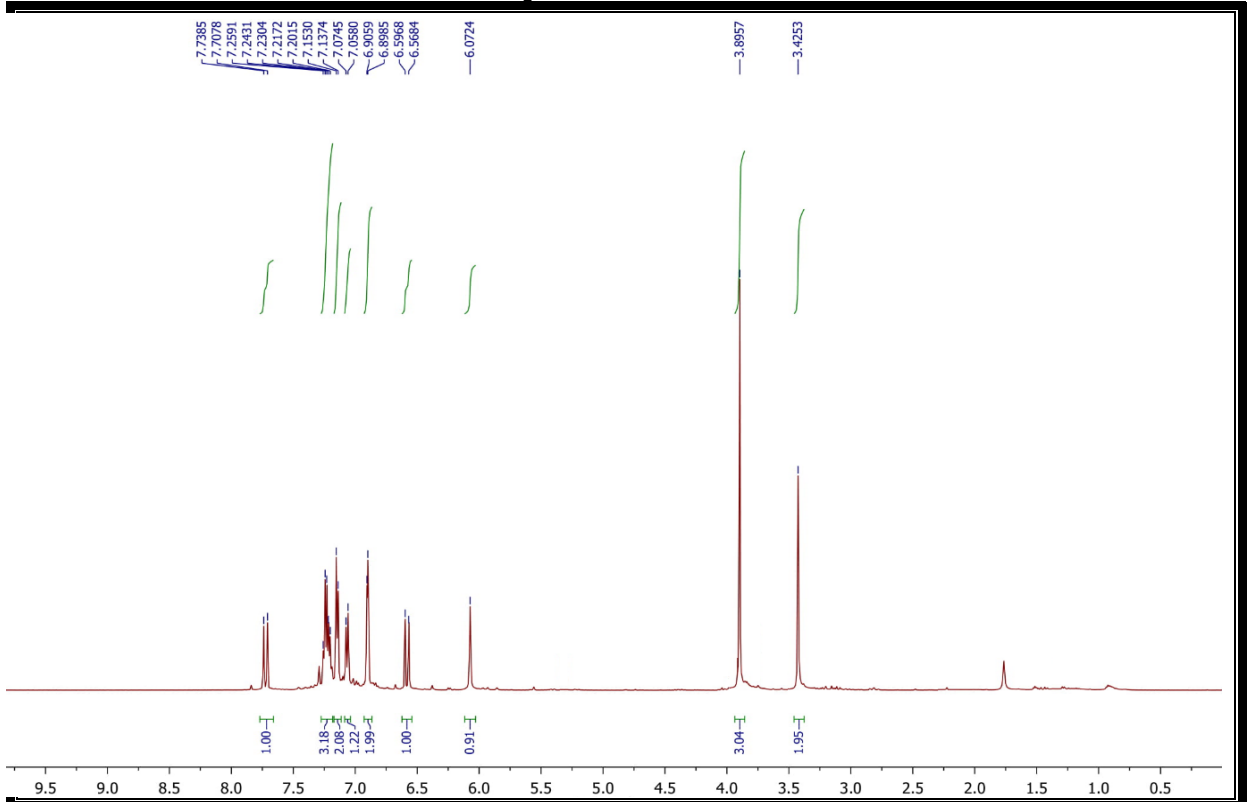

$^1\text{H}$  spectrum of **4m**

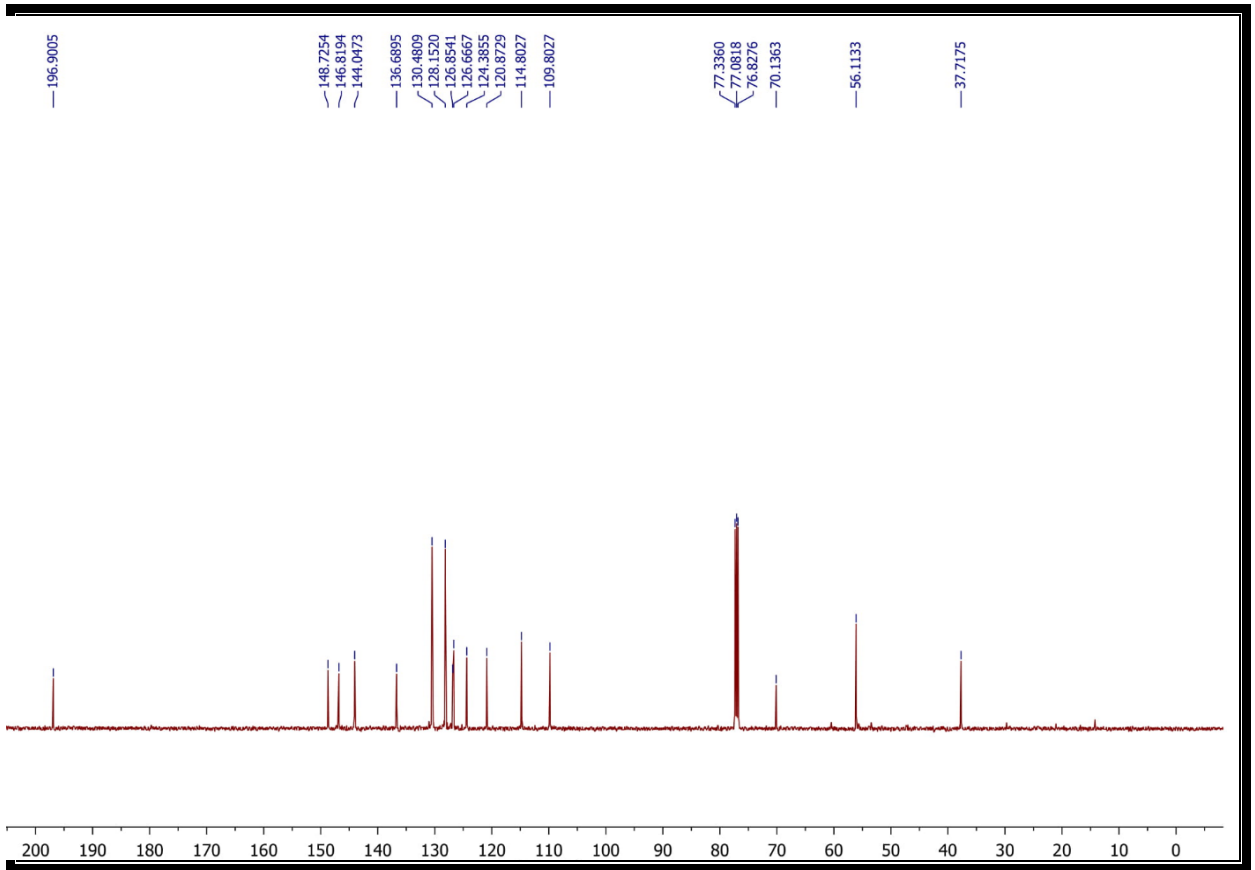

$^{13}\text{C}$  spectrum of 4m

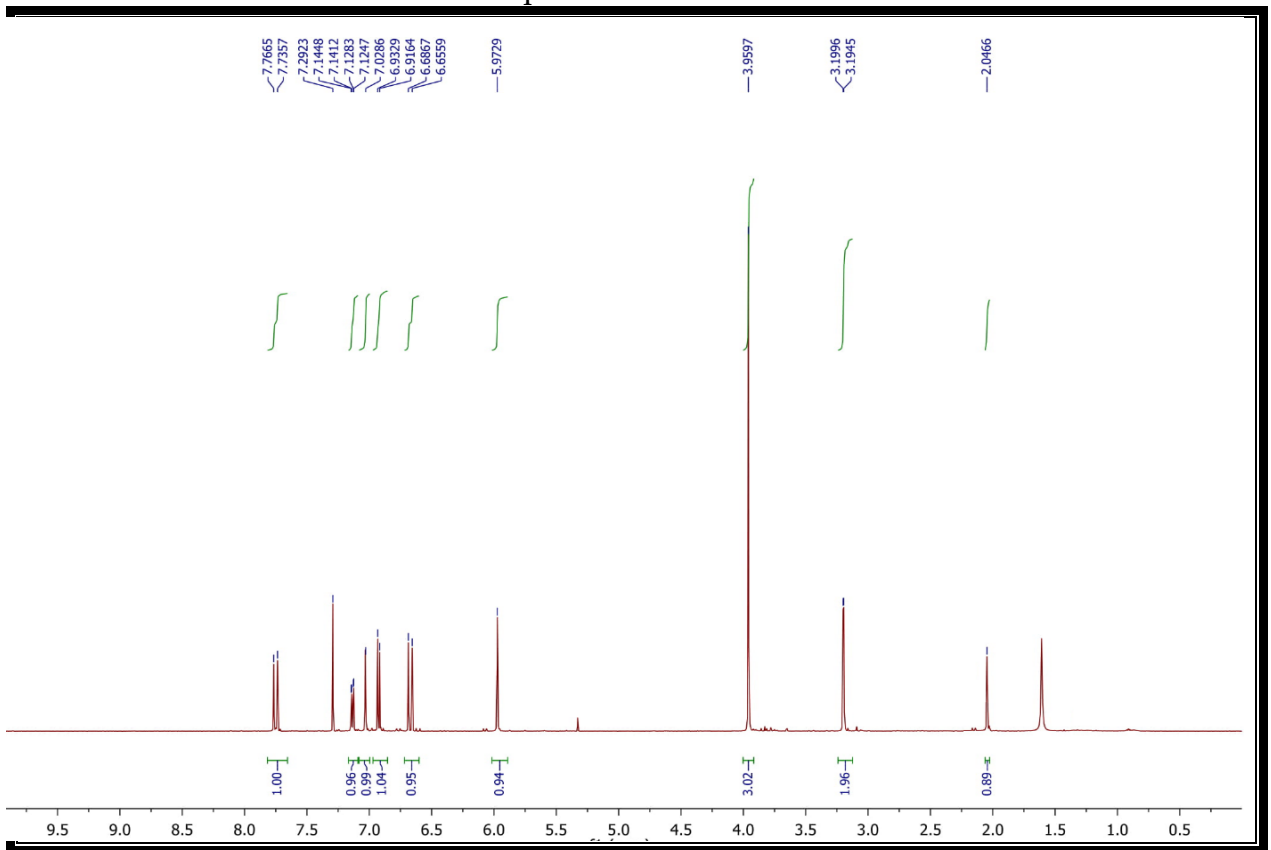

$^1\text{H}$  spectrum of 5m

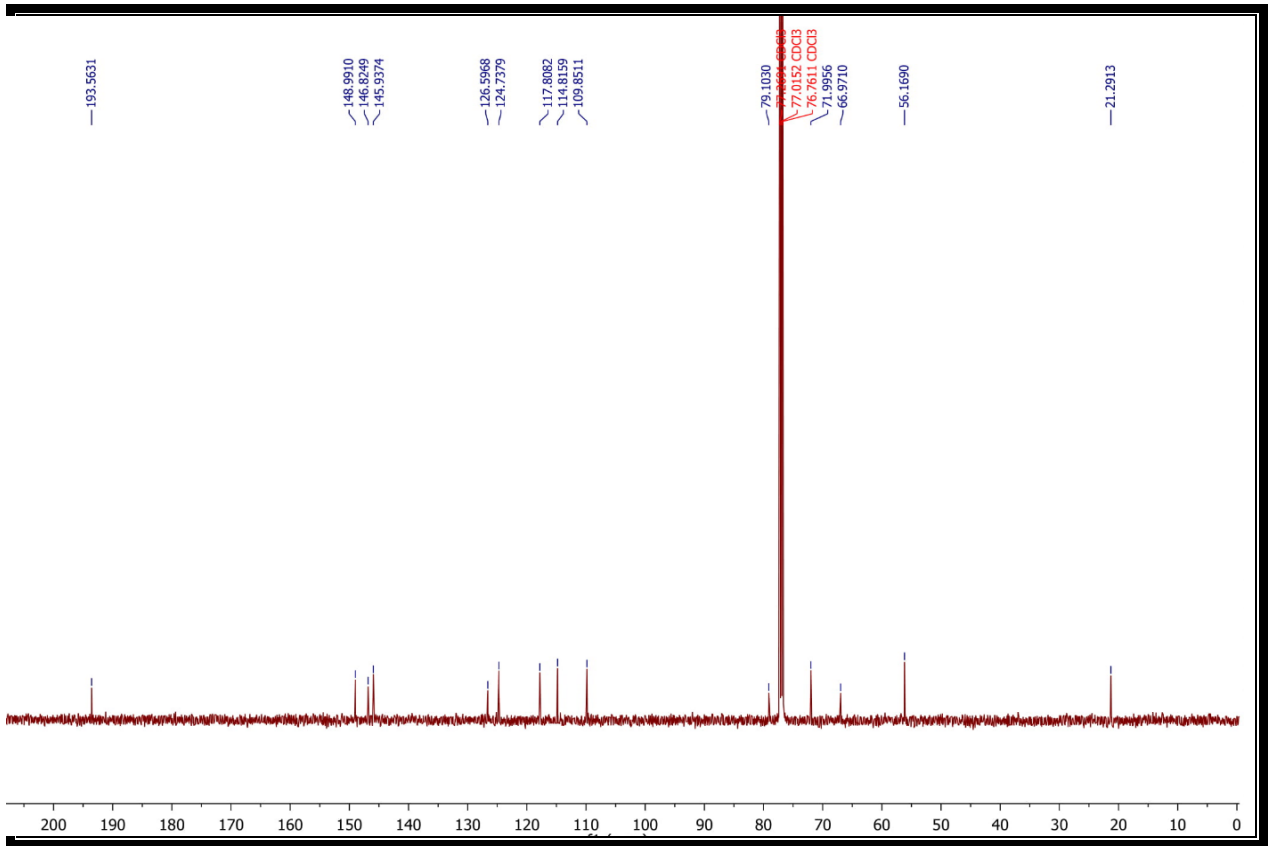

$^{13}\text{C}$  spectrum of 5m

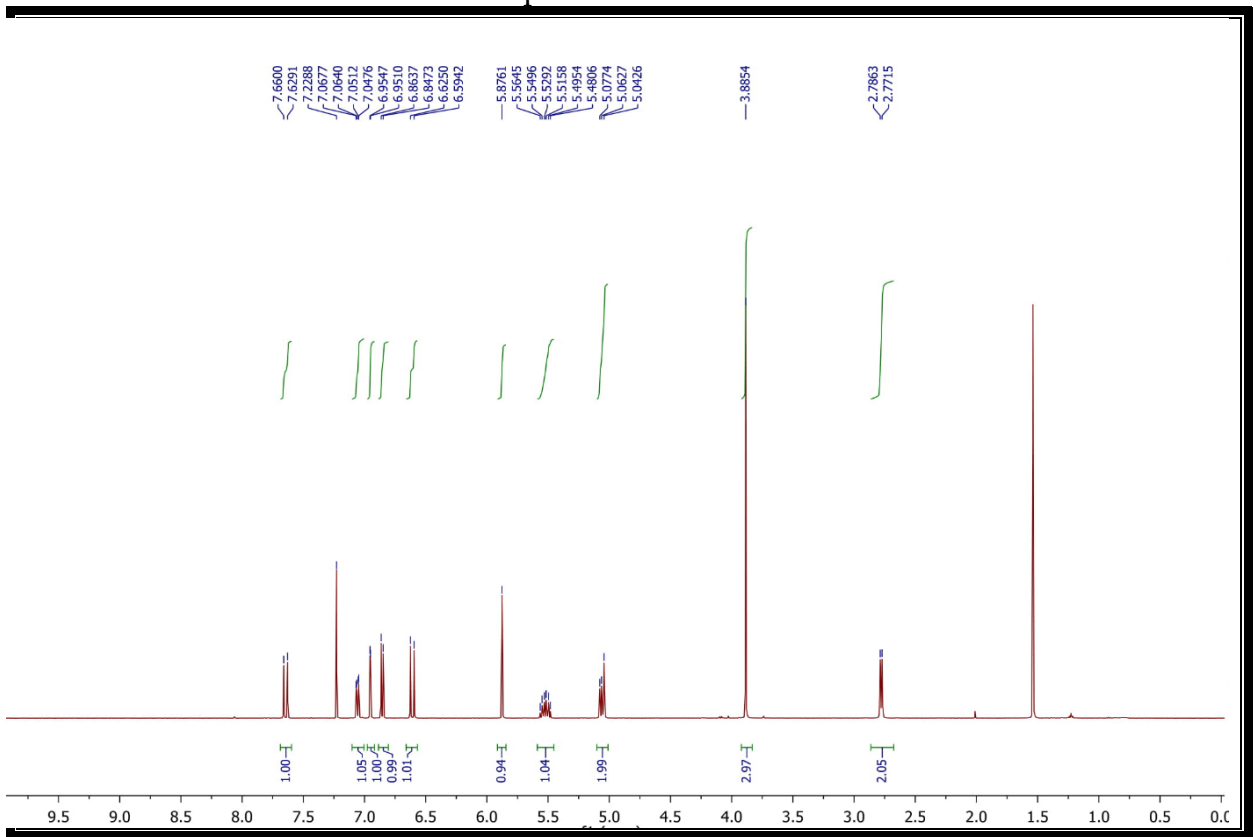

$^1\text{H}$  spectrum of 6m

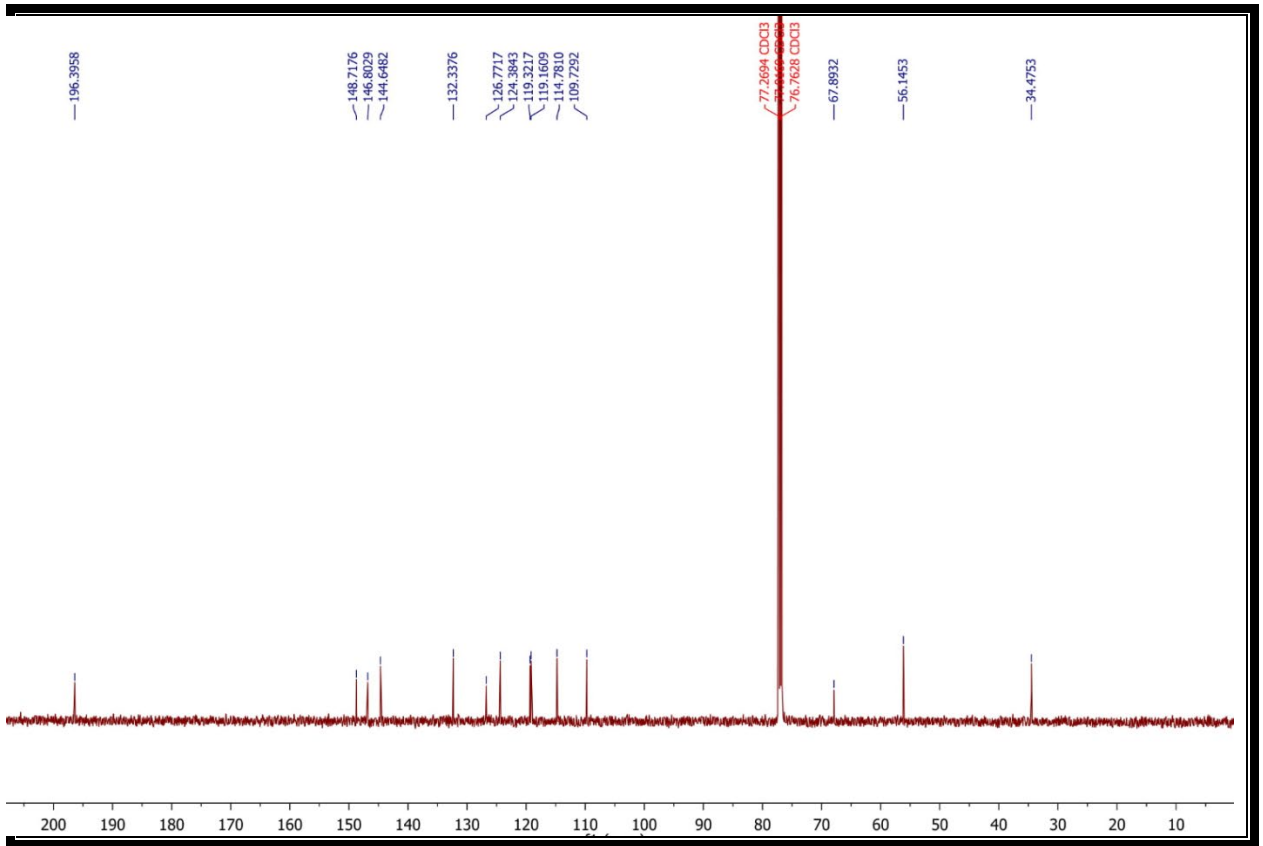

$^{13}\text{C}$  spectrum of 6m

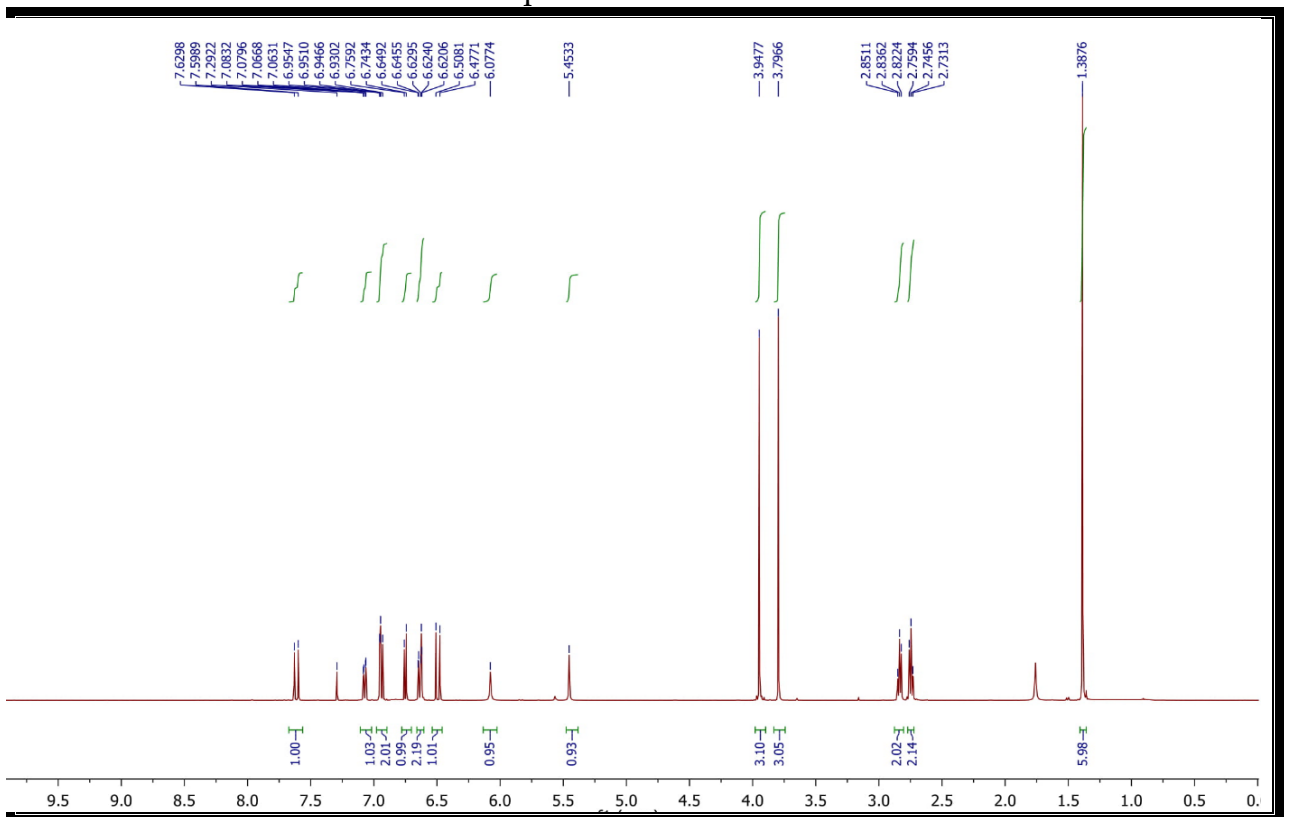

$^1\text{H}$  spectrum of 18

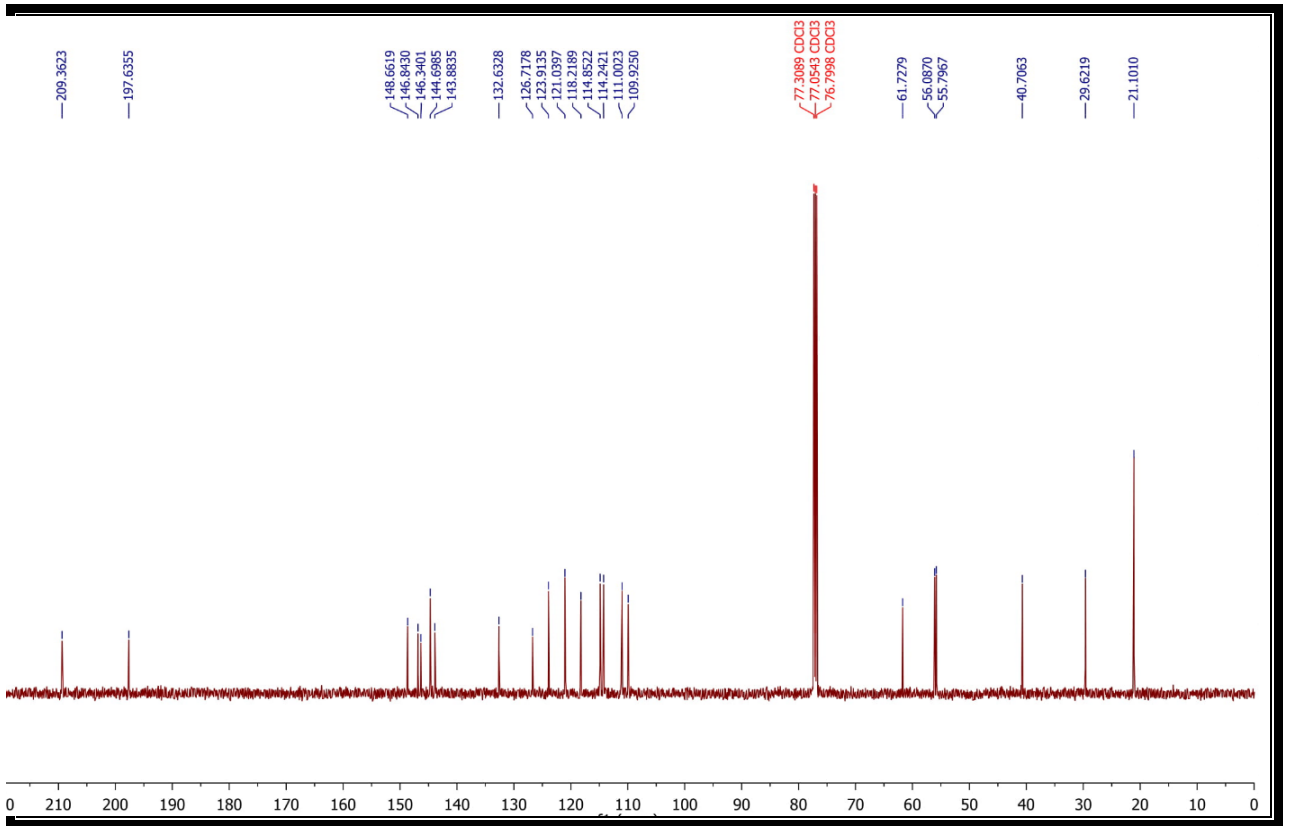

<sup>13</sup>C spectrum of 18

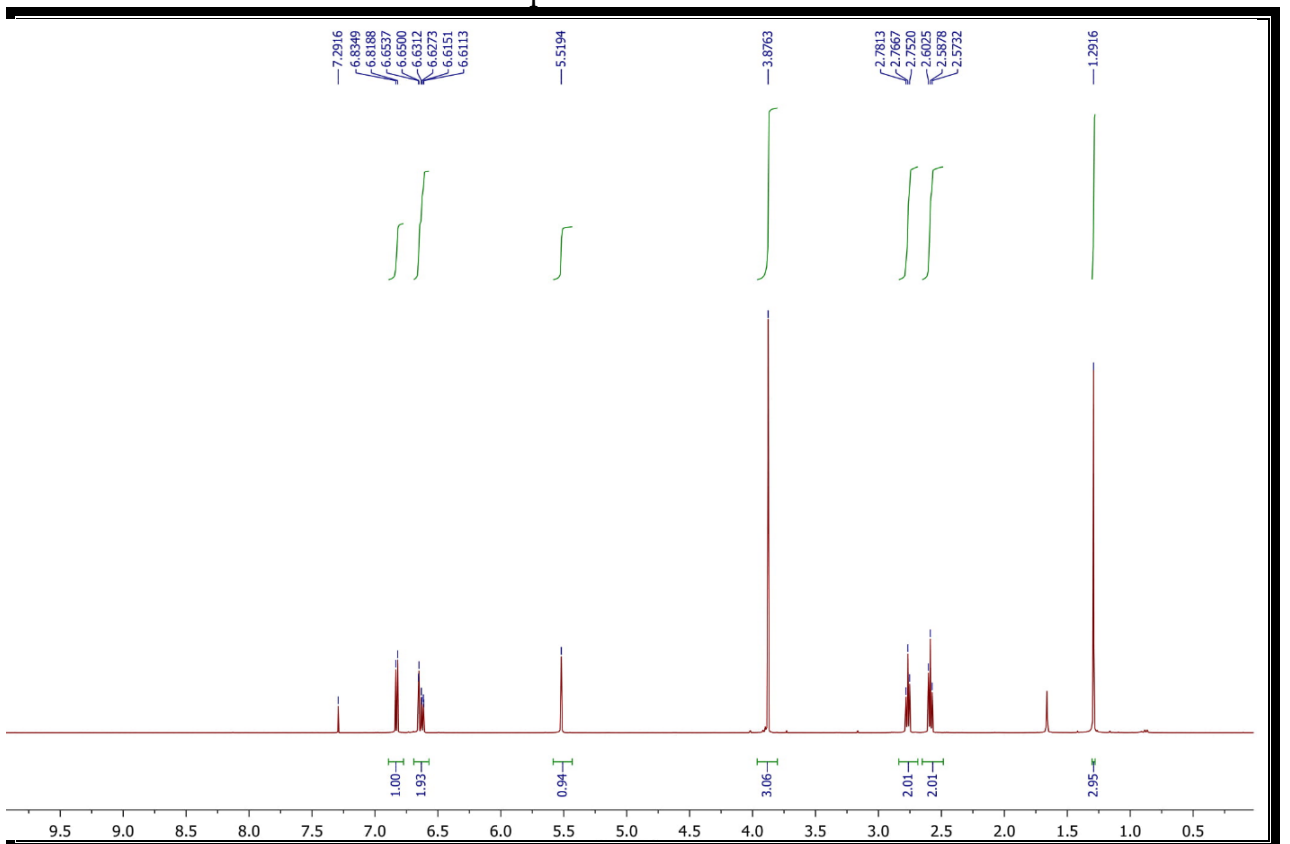

<sup>1</sup>H spectrum of 19



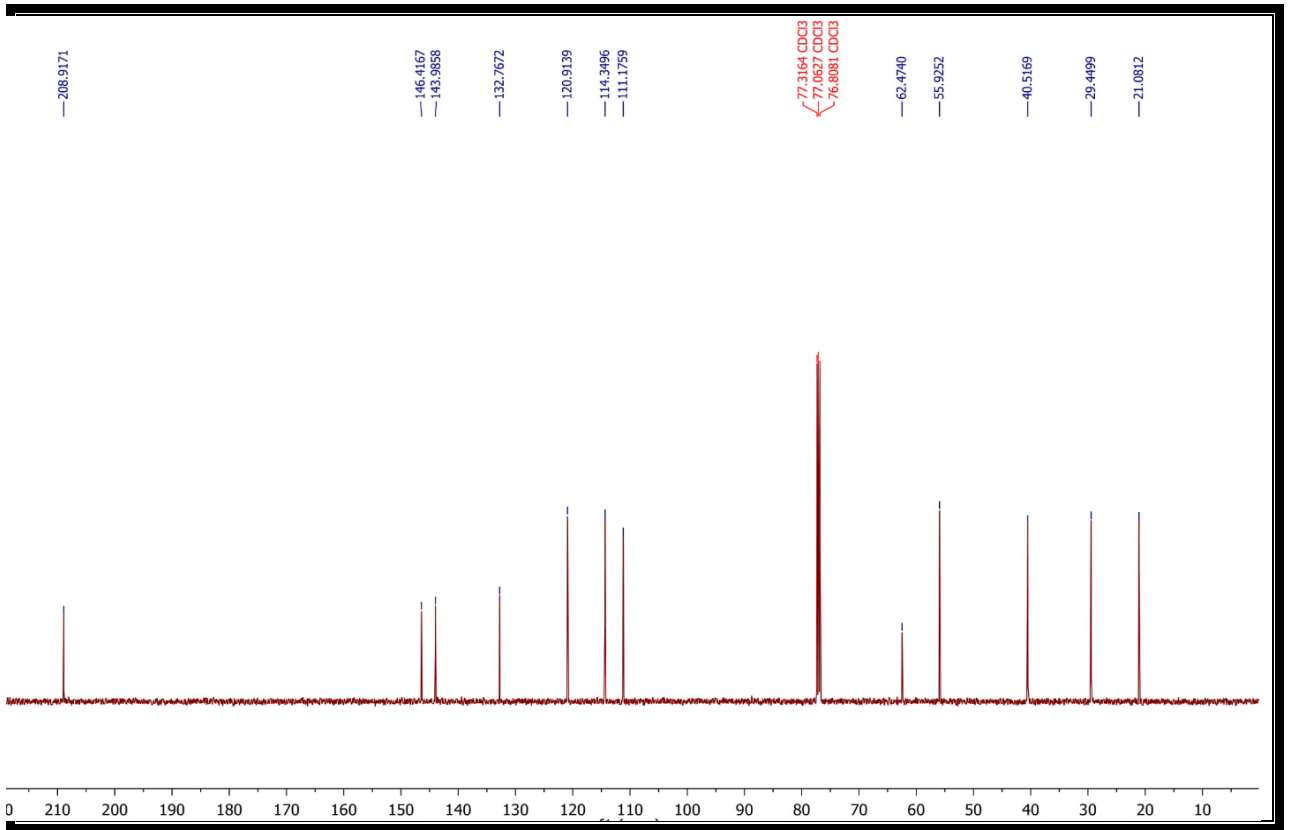

<sup>13</sup>C spectrum of 19

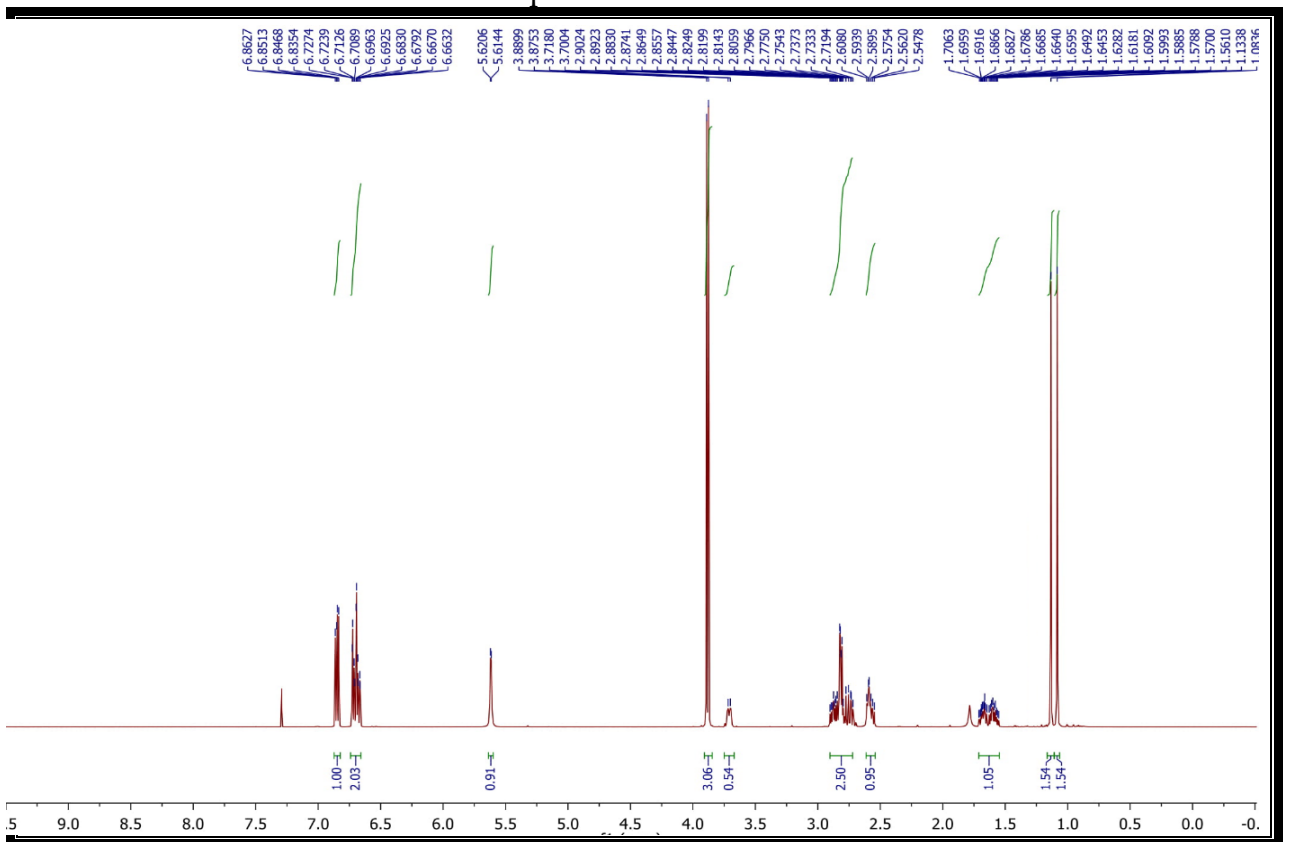

<sup>1</sup>H spectrum of 20

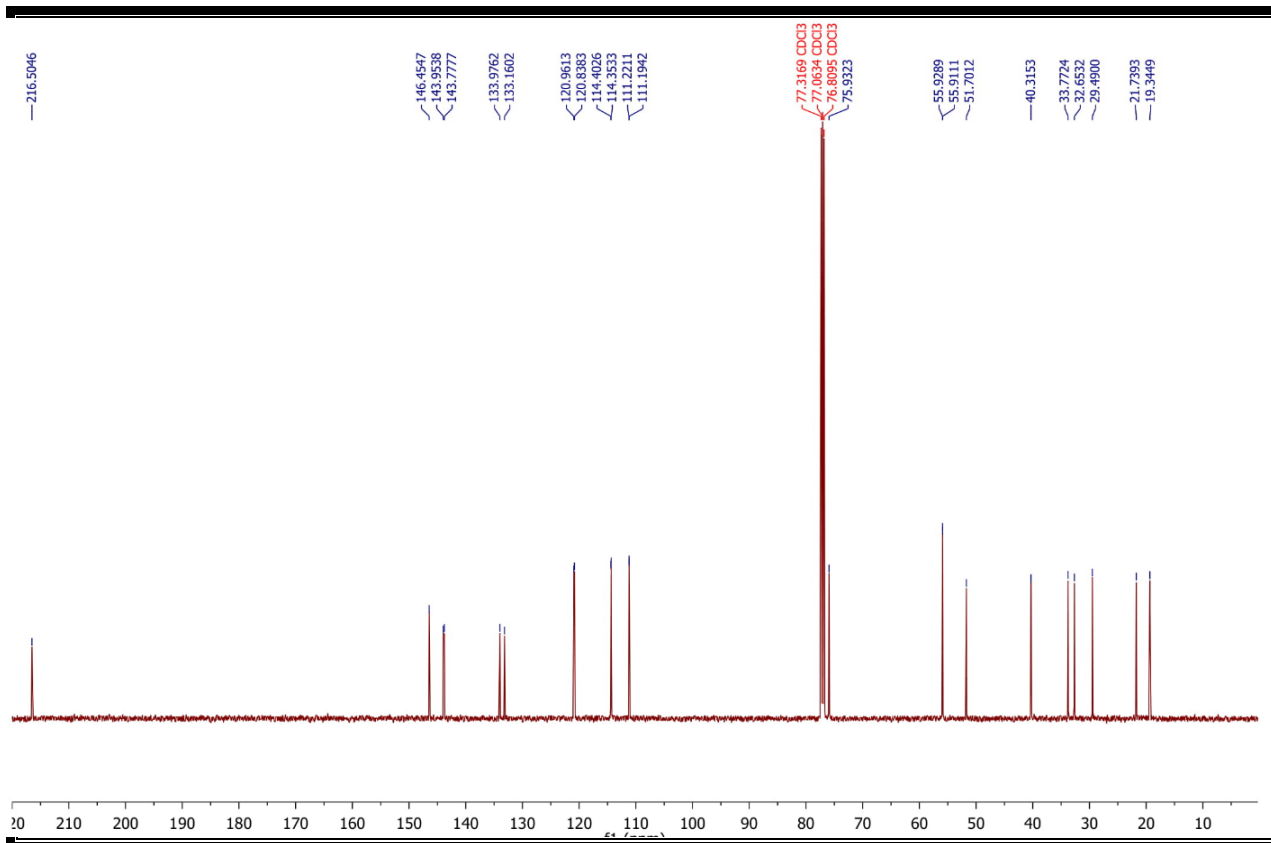

$^{13}\text{C}$  spectrum of 20

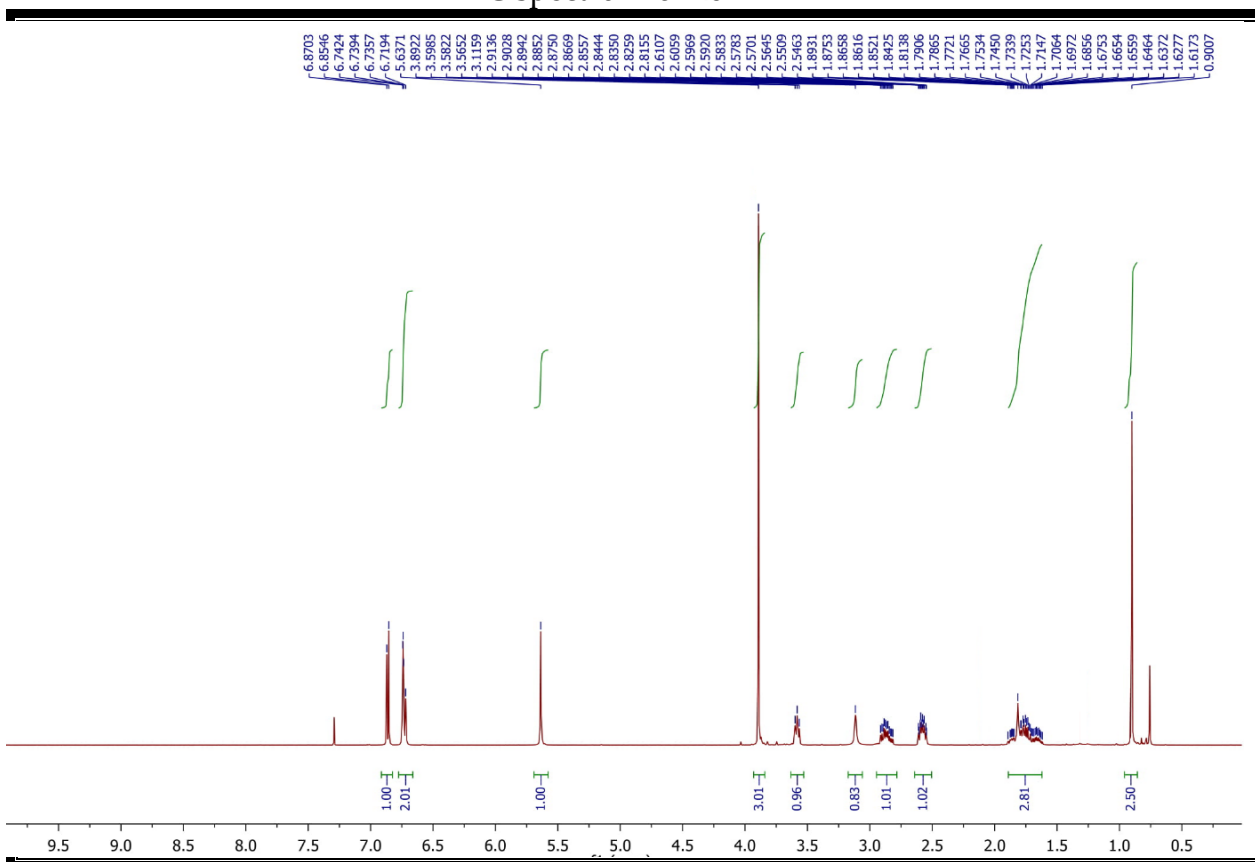

$^1\text{H}$  spectrum of 21

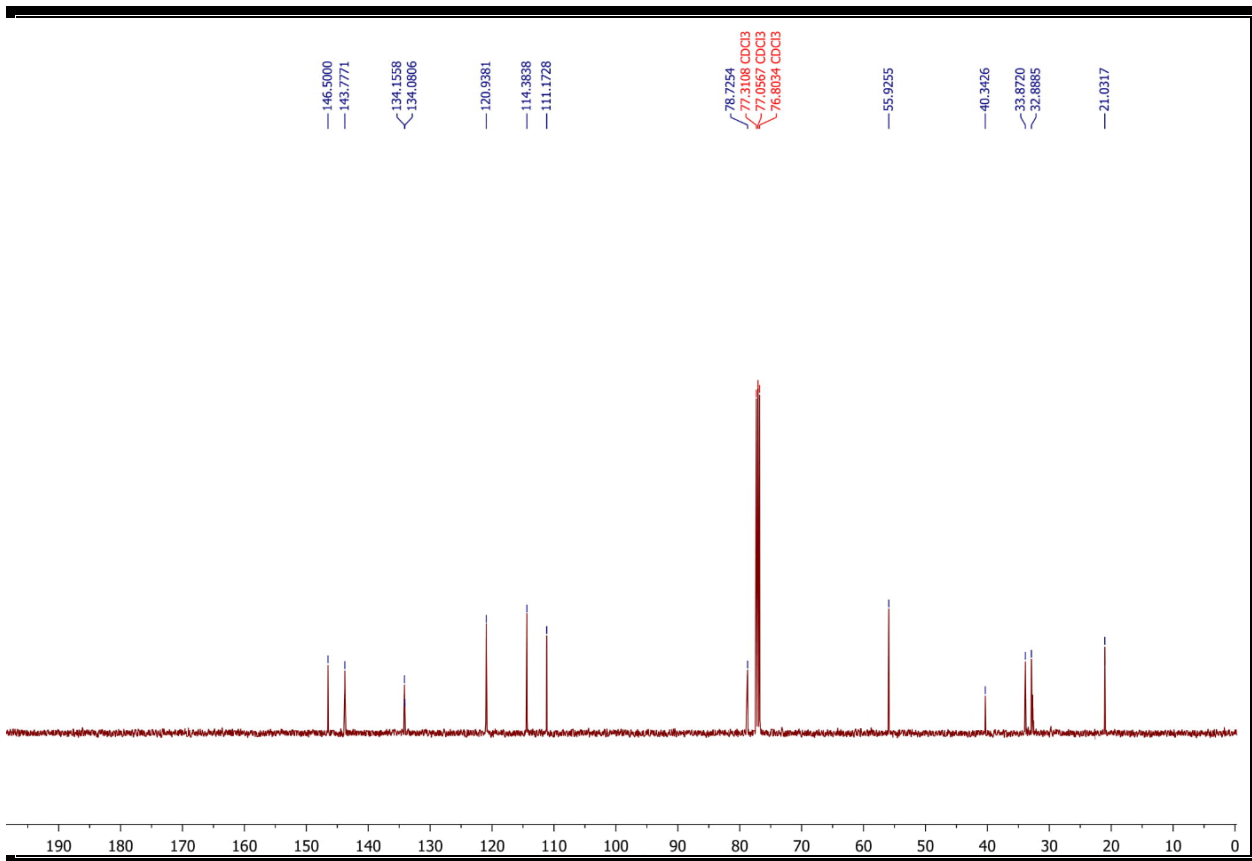

$^{13}\text{C}$  spectrum of 21
